# Supplementary material for: C-mannosylation supports folding and enhances stability of thrombospondin repeats
Source: eLife. 2019 Dec 23;8:e52978. doi: 10.7554/eLife.52978 (PMC6954052; doi:10.7554/eLife.52978)
Supplement: Figure 3—source data 1. [file elife-52978-fig3-data1.xlsx]

## Sheet: native CD spectra
		Native CD Spectra, raw data
		wavelength	(+) C-man (1)	(+) C-man (2)	(+) C-man (3)	(-) C-man (1)	(-) C-man (2)	(-) C-man (3)	(+) C-man	(-) C-man	(+) C-man	(-) C-man
		nm	mdeg	mdeg	mdeg	mdeg	mdeg	mdeg	average	average	smoooth	smooth
		260	2.46323	2.43892	2.39088	2.21461	2.23182	2.26294	2.43101	2.23646	2.43101	2.23646
		259	2.45296	2.41301	2.29984	2.28821	2.26251	2.26285	2.3886	2.27119	2.3886	2.27119
		258	2.39725	2.31825	2.32829	2.18016	2.24617	2.26009	2.34793	2.22881	2.34984	2.2337
		257	2.37627	2.2855	2.30604	2.20263	2.19066	2.21334	2.3226	2.20221	2.32373	2.22828
		256	2.34433	2.2964	2.27111	2.23829	2.18231	2.26127	2.30395	2.22729	2.29399	2.21199
		255	2.29007	2.27636	2.215	2.20808	2.23637	2.24326	2.26048	2.22923	2.26102	2.22263
		254	2.23104	2.22243	2.231	2.18817	2.1478	2.24384	2.22816	2.19327	2.23628	2.21404
		253	2.24053	2.22915	2.1353	2.16977	2.25344	2.25446	2.20166	2.22589	2.21172	2.18965
		252	2.19012	2.23431	2.1927	2.12458	2.12267	2.17194	2.20571	2.13973	2.18412	2.16773
		251	2.18807	2.13762	2.11187	2.15265	2.11175	2.16379	2.14585	2.14273	2.14317	2.14509
		250	2.10047	2.08579	2.0835	2.09648	2.10429	2.18596	2.08992	2.12891	2.1042	2.11204
		249	2.06455	2.06507	2.00801	2.11995	2.07946	2.06378	2.04588	2.08773	2.04981	2.09472
		248	2.05192	2.04336	2.01646	1.99673	2.10484	2.07604	2.03725	2.0592	2.01091	2.05708
		247	1.94884	1.99766	1.92931	2.06199	2.0577	1.99629	1.9586	2.03866	1.98027	2.03575
		246	1.94892	1.99218	1.96903	2.00239	2.02914	1.99617	1.97004	2.00923	1.97567	2.02362
		245	1.99265	1.93714	1.99013	2.05067	2.0575	2.04642	1.97331	2.05153	1.97212	2.03113
		244	1.9953	2.09097	1.98287	1.99392	2.03996	2.10176	2.02305	2.04521	1.9865	2.05853
		243	2.06479	1.94051	1.96742	2.15987	2.10838	2.10308	1.99091	2.12378	2.01085	2.10738
		242	2.04125	2.09525	2.06044	2.20091	2.17926	2.22359	2.06565	2.20126	2.07213	2.20287
		241	2.20492	2.26098	2.16421	2.41538	2.26617	2.35847	2.21004	2.34668	2.19227	2.36975
		240	2.38703	2.48187	2.40715	2.62219	2.58441	2.69319	2.42535	2.63327	2.42182	2.6031
		239	2.89158	2.742	2.68993	3.04138	2.91062	2.90338	2.7745	2.95179	2.76902	2.93817
		238	3.34537	3.34236	3.25536	3.53466	3.37541	3.29794	3.31436	3.40267	3.30704	3.41439
		237	4.15074	4.1085	4.01791	4.11142	4.06952	4.00327	4.09238	4.0614	4.11258	4.06956
		236	5.39047	5.17961	5.15928	5.06285	5.07918	4.85563	5.24312	4.99922	5.24452	4.98809
		235	6.83053	6.78574	6.69265	6.35812	6.21686	6.02471	6.76964	6.1999	6.79529	6.22387
		234	8.92581	8.72936	8.45841	7.98196	7.79638	7.57508	8.70453	7.78447	8.78927	7.82611
		233	11.4496	11.0395	10.8811	9.9812	9.71505	9.50929	11.1234	9.73518	11.1883	9.7802
		232	14.1276	13.6891	13.2697	12.3788	11.9432	11.655	13.6955	11.9923	13.7411	12.0088
		231	16.729	16.1508	15.6393	14.7814	14.2673	13.8593	16.1731	14.3027	16.0706	14.3508
		230	18.2811	17.8989	17.2978	17.1174	16.4422	15.8384	17.8259	16.466	17.7526	16.4731
		229	19.155	18.5609	17.9891	18.7756	18.032	17.7028	18.5683	18.1701	18.4837	18.0107
		228	18.9116	18.1736	17.6995	19.4855	18.8404	18.148	18.2616	18.8246	18.1723	18.7664
		227	17.5425	17.0757	16.4548	19.2677	18.4056	18.0436	17.0243	18.5723	17.0438	18.5928
		226	15.7283	15.2068	14.8866	18.372	17.4315	17.2231	15.2739	17.6755	15.2998	17.544
		225	13.9067	13.2803	12.8964	16.6082	15.898	15.4222	13.3611	15.9761	13.3397	15.9829
		224	11.6976	11.3582	10.8427	14.4514	14.0145	13.6329	11.2995	14.0329	11.412	14.1942
		223	10.1374	9.61151	9.47261	12.7828	12.3811	12.0776	9.74052	12.4138	9.70237	12.3938
		222	8.64491	8.22043	8.04448	11.3223	11.0659	10.239	8.30327	10.8757	8.33534	10.8143
		221	7.84454	7.3417	6.91908	9.91463	9.52561	9.06129	7.36844	9.50051	7.40429	9.54226
		220	7.25799	6.84396	6.43519	8.84847	8.75288	8.13475	6.84572	8.5787	6.85687	8.69309
		219	7.20461	6.64348	6.32356	8.6371	8.17641	7.78291	6.72388	8.19881	6.75105	8.24104
		218	7.36342	6.81854	6.48352	8.75158	8.56321	7.60711	6.88849	8.3073	6.92503	8.18431
		217	7.73257	7.25003	6.87832	8.64057	8.37137	7.60828	7.28697	8.20674	7.22448	8.29152
		216	8.40875	7.4963	6.68507	9.06603	8.5211	7.93712	7.53004	8.50808	7.49464	8.45217
		215	8.38187	7.5733	6.91892	9.20671	8.28203	7.97108	7.6247	8.48661	7.61511	8.5289
		214	8.01815	7.88161	6.84046	9.25292	8.39199	8.02963	7.58007	8.55818	7.61982	8.512
		213	8.02497	7.22808	6.87319	8.61228	8.24973	7.76797	7.37541	8.20999	7.43274	8.17921
		212	7.64165	7.65436	6.19351	8.55596	7.53095	6.91197	7.16317	7.6663	7.04353	7.71082
		211	7.27007	5.9849	5.57092	7.42124	6.66479	6.08075	6.2753	6.72226	6.33712	6.83579
		210	6.00407	5.22377	4.73175	6.41408	5.87885	5.20283	5.31986	5.83192	5.24955	5.47556
		209	4.30532	3.97535	3.09344	4.67971	3.18255	3.42905	3.79137	3.76377	3.8026	3.94264
		208	3.02754	1.90367	1.19786	2.42463	1.24793	1.275	2.04302	1.64919	2.07149	1.92747
		207	0.53909	0.5035	-0.64315	1.07486	-0.1279	-0.52792	0.13315	0.13968	0.03621	-0.34502
		206	-1.1751	-2.03752	-3.14539	-2.53155	-3.97951	-2.95284	-2.11934	-3.15463	-1.95847	-2.90278
		205	-4.33624	-3.98213	-4.58452	-5.15031	-5.5423	-5.69412	-4.30096	-5.46224	-4.19688	-5.61994
		204	-5.74346	-5.97106	-6.96779	-9.17773	-9.26978	-7.90558	-6.22744	-8.78436	-6.68451	-8.42396
		203	-9.53672	-9.25414	-9.4846	-10.8809	-11.0358	-11.072	-9.42515	-10.9962	-9.3119	-11.4017
		202	-11.3703	-12.2373	-12.4148	-13.0178	-14.1759	-14.3847	-12.0075	-13.8595	-11.793	-13.9534
		201	-13.4929	-14.0727	-14.7655	-16.9971	-16.7627	-18.2303	-14.1104	-17.33	-13.8579	-16.7474
		200	-16.5005	-14.6504	-15.0953	-16.056	-16.6068	-20.5408	-15.4154	-17.7345	-15.834	-18.929
		199	-17.1154	-17.7087	-16.0837	-20.6852	-21.3378	-21.8555	-16.9693	-21.2928	-17.3554	-19.4049
		198	-20.4204	-18.2	-19.912	-21.6075	-18.076	-18.0326	-19.5108	-19.2387	-18.7011	-19.8513
		197	-14.6884	-19.1382	-22.5367	-18.2454	-17.7149	-17.5484	-18.7878	-17.8363	-19.0718	-19.2664
		196	-21.386	-16.9467	-19.5056	-19.6602	-18.8799	-23.2099	-19.2795	-20.5833	-19.0118	-18.6598
		195	-18.1072	-16.723	-16.557	-16.6419	-16.1902	-16.4588	-17.1291	-16.4303	-18.0195	-18.4711
		194	-17.6426	-16.068	-19.1074	-18.0701	-14.292	-22.977	-17.606	-18.4464	-16.0876	-16.3509
		193	-13.4229	-14.4966	-15.0111	-14.2715	-13.419	-14.7545	-14.3102	-14.1483	-14.6631	-13.3856
		192	-15.9304	-5.98671	-12.6998	-4.19222	-8.48079	-15.4871	-11.539	-9.38671	-13.3659	-12.4453
		191	-14.452	-16.969	-11.956	-14.9683	-13.2229	-7.00518	-14.459	-11.7321	-11.9435	-11.6641
		190	-14.264	-16.0131	-4.70604	-14.0332	-17.9207	-10.4367	-11.661	-14.1302	-13.5373	-12.2973
		189	-14.5335	-11.2375	-13.5981	-13.1352	-4.9798	-18.6471	-13.123	-12.254	-14.4557	-11.3509
		188	-19.1965	-8.58111	-27.2531	-10.8488	-13.676	-6.36606	-18.3436	-10.297	-14.1879	-11.4038
		187	-18.1164	-7.62024	-10.0589	-8.04789	-8.41543	-6.54666	-11.9319	-7.66999	-14.5074	-10.3477
		186	-13.1881	-9.79558	-13.6375	-15.4726	-11.2087	-23.426	-12.2071	-16.7024	-11.7437	-12.8794
		185	-5.00583	-18.5832	-11.6227	-18.3709	-6.1837	-7.2095	-11.7372	-10.588	-10.9551	-14.7296
		184	-10.5502	-8.85696	-0.73794	-11.4379	-21.3006	-25.236	-6.71505	-19.3248	-9.69588	-13.8603
		183	-19.4639	-11.3278	-13.8727	-14.2316	-4.54846	-11.7519	-14.8881	-10.1773	-9.87344	-11.7773
		182	-1.18898	-11.6706	-1.25578	-20.2086	-5.5665	4.91492	-4.70511	-6.95338	-10.7216	-10.2392
		181	-20.5667	-14.6853	-9.77359	-13.0947	-11.6143	-11.9305	-15.0085	-12.2132	-10.0944	-8.41522
		180	-8.11567	-0.30058	-23.4121	-11.8023	-6.43183	-6.64612	-10.6094	-8.29343	-10.8794	-11.1358
		179	-12.4921	2.03607	-13.0361	-6.15989	-13.9241	-24.4243	-7.83073	-14.8361	-7.83073	-14.8361
		178	-12.6262	-18.66	-28.2507	-22.7942	-16.6515	-15.5201	-19.8456	-18.322	-19.8456	-18.322
