# Supplementary material for: C-mannosylation supports folding and enhances stability of thrombospondin repeats
Source: eLife. 2019 Dec 23;8:e52978. doi: 10.7554/eLife.52978 (PMC6954052; doi:10.7554/eLife.52978)
Supplement: Figure 3—source data 2. [file elife-52978-fig3-data2.xlsx]

## Sheet: thermal denaturation
		Thermal Denaturation
		Temperature	(-) C-man (1)	(-) C-man (1)	Temperature	(-) C-man (2)	(-) C-man (2)	Temperature	(-) C-man (2)	(-) C-man (3)	Temperature	(+) C-man (1)	(+) C-man (1)	Temperature	(+) C-man (2)	(+) C-man (2)	Temperature	(+) C-man (3)	(+) C-man (1)
		°C	mdeg	normalized	°C	mdeg	normalized	°C	mdeg	normalized	°C	mdeg	normalized	°C	mdeg	normalized	°C	mdeg	normalized
		23.3881	20.8484	0.98739	23.687	17.6134	0.96804	23.3632	14.4022	0.97468	23.5376	15.3757	0.9758	25.3543	13.2899	0.99337	23.413	19.0253	0.98636
		24.409	21.2255	1	24.7324	17.5754	0.96663	24.4338	14.894	0.99422	24.409	15.5173	0.98188	26.3732	13.4003	0.99847	24.3094	18.9555	0.98318
		25.3294	21.09	0.99547	25.752	17.4682	0.96267	25.404	15.0395	1	25.3791	15.5642	0.98389	27.3168	13.1827	0.98842	25.3543	19.0929	0.98944
		26.4229	20.6429	0.98052	26.7458	17.6214	0.96834	26.3484	14.7158	0.98714	26.249	15.6461	0.98741	28.3588	13.4334	1	26.3236	19.1812	0.99346
		27.4161	20.8481	0.98738	27.7139	17.7451	0.97291	27.3168	14.9121	0.99494	27.292	15.5359	0.98268	29.3007	13.2838	0.99309	27.2672	19.158	0.9924
		28.3092	20.7237	0.98322	28.6563	17.8247	0.97586	28.4084	14.7742	0.98946	28.1604	15.6303	0.98673	30.2914	13.3574	0.99649	28.3588	19.2777	0.99785
		29.3255	20.638	0.98036	29.6723	17.9059	0.97886	29.3007	14.8956	0.99428	29.2016	15.769	0.99268	31.3306	13.2423	0.99117	29.2512	19.132	0.99122
		30.3904	20.7353	0.98361	30.6626	18.4774	1	30.2914	14.5827	0.98185	30.1923	15.9302	0.99961	32.3196	13.1572	0.98724	30.2418	19.2555	0.99684
		31.207	20.4219	0.97313	31.6027	17.7719	0.9739	31.2812	14.5999	0.98254	31.2317	15.6769	0.98873	33.2583	13.187	0.98861	31.2317	19.0179	0.98602
		32.3196	20.8851	0.98862	32.6902	17.9421	0.9802	32.2949	14.4532	0.97671	32.0724	15.5645	0.98391	34.1964	13.2106	0.98971	32.2701	19.2451	0.99637
		33.2336	20.6356	0.98028	33.604	18.0234	0.98321	33.283	14.7413	0.98815	33.0854	15.7845	0.99335	35.183	13.0425	0.98194	33.2089	19.3248	1
		34.1964	20.7054	0.98261	34.6158	17.4612	0.96241	34.2457	14.2379	0.96816	34.147	15.7608	0.99233	36.2182	13.4117	0.999	34.1224	19.0564	0.98777
		35.257	20.1821	0.96511	35.5528	17.2852	0.9559	35.183	13.9908	0.95834	35.1337	15.8288	0.99525	37.1787	12.9981	0.97989	35.183	19.1924	0.99397
		36.2182	19.9035	0.9558	36.5877	17.3394	0.9579	36.2182	13.7584	0.94911	36.0211	15.8086	0.99438	38.0893	13.1873	0.98863	36.095	19.0187	0.98606
		37.2033	19.7446	0.95048	37.548	16.8608	0.9402	37.1787	13.3129	0.93141	37.0556	15.7177	0.99048	39.1715	13.2262	0.99043	37.1295	18.9739	0.98402
		38.2124	19.2196	0.93293	38.5321	16.1269	0.91305	38.237	12.9766	0.91806	38.0401	15.6876	0.98919	40.1545	13.1407	0.98648	38.1385	19.0745	0.9886
		39.1715	18.7087	0.91585	39.5402	15.9433	0.90626	39.1469	12.3211	0.89202	39.0239	15.9394	1	41.1123	13.2194	0.99011	39.0731	18.9483	0.98285
		40.2036	18.6561	0.91409	40.4738	15.7245	0.89817	40.1545	11.8422	0.87299	40.0071	15.383	0.97611	42.1185	12.9411	0.97725	40.1053	18.9103	0.98112
		41.0632	17.9485	0.89043	41.4805	14.923	0.86852	41.1614	11.3863	0.85488	40.965	15.176	0.96723	43.1486	12.9459	0.97747	41.0141	18.8378	0.97782
		42.1185	17.1899	0.86506	42.5601	14.1587	0.84025	42.1185	10.6464	0.82549	41.9713	15.5308	0.98246	44.1046	12.317	0.94841	42.1431	18.6213	0.96796
		43.1486	16.256	0.83383	43.5409	13.5516	0.81779	43.1241	9.61776	0.78463	42.928	15.1168	0.96469	45.1089	12.5745	0.96031	43.0996	18.5559	0.96498
		44.1291	15.1434	0.79663	44.4231	12.397	0.77508	44.1291	8.79783	0.75206	43.9575	15.0649	0.96246	46.0637	11.9723	0.93249	44.0556	18.4374	0.95958
		45.1089	14.12	0.76241	45.4762	11.9287	0.75776	45.0599	7.75901	0.7108	44.913	14.6461	0.94448	47.0913	12.0807	0.9375	44.9864	18.1271	0.94545
		46.1615	13.1634	0.73043	46.4063	10.4187	0.7019	46.0392	6.7966	0.67257	45.9902	14.6361	0.94405	47.996	11.7079	0.92027	46.0147	17.8274	0.93179
		47.1402	11.7993	0.68481	47.3847	9.42364	0.66509	47.1157	5.30582	0.61335	46.92	14.6362	0.94406	49.0225	11.0937	0.89189	47.0179	17.4307	0.91372
		47.996	10.6399	0.64605	48.4116	7.90263	0.60883	48.1183	4.47427	0.58032	47.9471	13.8967	0.91231	49.9752	11.0948	0.89194	47.996	17.3416	0.90967
		49.047	9.17778	0.59716	49.4623	6.83161	0.56921	49.0225	3.26791	0.5324	48.8515	13.3659	0.88952	51.0006	10.2205	0.85154	48.9736	16.7999	0.88499
		50.024	7.71993	0.54841	50.3659	5.64875	0.52546	50.024	1.83493	0.47547	49.8775	13.2474	0.88444	52.0987	9.67162	0.82618	49.9508	16.1557	0.85565
		51.0982	6.14748	0.49583	51.3667	4.48839	0.48253	51.0738	0.77416	0.43334	50.8785	12.621	0.85755	53.123	8.9838	0.7944	50.9518	15.791	0.83904
		52.0255	4.85578	0.45264	52.4158	3.23232	0.43607	52.0987	-0.54395	0.38098	51.9035	12.1664	0.83803	54.0494	8.3113	0.76332	52.0255	15.0935	0.80727
		53.123	2.82778	0.38483	53.4156	1.7077	0.37967	53.0499	-1.7608	0.33264	52.9279	11.2824	0.80008	54.9997	7.24866	0.71422	52.9767	14.3743	0.77451
		54.0494	1.6939	0.34692	54.4393	0.8162	0.3467	53.9762	-2.59487	0.29951	53.7813	10.3268	0.75906	55.974	6.45606	0.6776	53.9275	13.444	0.73213
		55.0241	0.64393	0.31181	55.3895	-0.21742	0.30846	55.0241	-3.34778	0.2696	54.8292	9.46626	0.72212	56.9479	5.37669	0.62772	54.951	12.7218	0.69924
		55.974	-0.41348	0.27645	56.3636	-0.67754	0.29144	55.9984	-4.66038	0.21746	55.8035	8.34888	0.67415	57.9458	4.32596	0.57917	55.8522	11.7838	0.65651
		56.9966	-1.39554	0.24361	57.313	-1.91365	0.24572	57.021	-5.21143	0.19557	56.8019	7.76444	0.64906	58.8946	2.96666	0.51636	56.8749	10.9843	0.62009
		57.9458	-2.35372	0.21157	58.3351	-2.96536	0.20681	57.9945	-5.97401	0.16528	57.7998	6.47282	0.59361	59.8918	2.04457	0.47376	57.7755	9.89713	0.57057
		58.8703	-3.16128	0.18457	59.3568	-3.02954	0.20444	58.9433	-6.12008	0.15948	58.773	5.51724	0.55259	60.9129	1.21836	0.43558	58.7973	8.88654	0.52454
		59.8918	-3.58381	0.17044	60.3052	-4.38629	0.15425	59.9891	-7.03342	0.1232	59.7945	4.4317	0.50599	61.8608	0.04635	0.38142	59.8432	7.68211	0.46968
		60.8886	-3.66043	0.16788	61.3018	-4.61137	0.14593	60.9615	-7.10988	0.12016	60.6941	3.29385	0.45714	62.9056	-0.88158	0.33855	60.84	6.58799	0.41984
		61.8851	-5.06924	0.12078	62.3711	-5.40643	0.11652	61.9823	-7.71885	0.09597	61.715	2.15322	0.40818	63.8044	-2.23101	0.27619	61.7879	5.67914	0.37844
		62.8327	-5.04249	0.12167	63.2943	-5.33446	0.11918	62.9299	-7.93215	0.0875	62.6141	0.9696	0.35737	64.8729	-2.77268	0.25117	62.7598	4.60871	0.32969
		63.8529	-5.99516	0.08981	64.2658	-5.90931	0.09791	63.8529	-7.79787	0.09283	63.6343	0.32707	0.32979	65.8683	-3.43339	0.22064	63.8286	3.76118	0.29108
		64.8971	-6.08607	0.08678	65.2613	-6.5596	0.07386	64.8729	-8.66957	0.0582	64.63	-0.71491	0.28505	66.7906	-4.67241	0.16338	64.7757	2.91957	0.25275
		65.8683	-6.23521	0.08179	66.2324	-6.55813	0.07391	65.8197	-8.56162	0.06249	65.5527	-1.3127	0.25939	67.8341	-4.6502	0.16441	65.6983	2.29453	0.22428
		66.8391	-6.50792	0.07267	67.2274	-6.57032	0.07346	66.8634	-8.55657	0.06269	66.6693	-2.50798	0.20808	68.7803	-5.1869	0.13961	66.7663	1.65714	0.19524
		67.7856	-7.01189	0.05582	68.1981	-6.86089	0.06271	67.8826	-8.72484	0.05601	67.6157	-2.90645	0.19097	69.7992	-6.18592	0.09345	67.6885	0.89428	0.1605
		68.7076	-6.68501	0.06675	69.217	-7.11421	0.05334	68.8289	-9.15973	0.03873	68.5863	-3.37698	0.17078	70.8179	-6.34623	0.08604	68.7803	0.48775	0.14198
		69.7507	-6.99741	0.0563	70.1873	-7.38038	0.0435	69.8477	-8.88898	0.04949	69.5081	-4.12763	0.13855	71.7637	-6.34365	0.08616	69.7022	-0.08025	0.11611
		70.7209	-7.48725	0.03992	71.1089	-7.6036	0.03524	70.7694	-9.2336	0.0358	70.5754	-4.37334	0.128	72.7579	-6.9819	0.05667	70.6724	-0.24974	0.10839
		71.8364	-7.01314	0.05578	72.1517	-7.515	0.03852	71.7152	-9.47908	0.02605	71.5697	-5.08087	0.09763	73.7035	-7.06627	0.05277	71.6425	-0.74559	0.0858
		72.7336	-7.60526	0.03598	73.0973	-7.76028	0.02944	72.8064	-9.31974	0.03238	72.5882	-5.49332	0.07992	74.746	-7.49198	0.0331	72.5882	-0.99716	0.07434
		73.7762	-7.52027	0.03882	74.1884	-7.85871	0.0258	73.752	-9.45242	0.02711	73.4853	-5.51554	0.07897	75.7157	-7.35768	0.03931	73.6065	-1.37998	0.0569
		74.6975	-7.50774	0.03924	75.1581	-7.99455	0.02078	74.649	-9.36636	0.03052	74.455	-5.95139	0.06026	76.7338	-7.556	0.03014	74.5763	-1.43963	0.05419
		75.6672	-7.84674	0.0279	76.0793	-8.09893	0.01692	75.7157	-9.41344	0.02865	75.4732	-5.99692	0.05831	77.6549	-7.36302	0.03906	75.5944	-1.58561	0.04754
		76.6853	-7.8864	0.02658	77.1944	-8.07548	0.01778	76.7338	-9.72178	0.01641	76.4914	-6.51089	0.03624	78.7215	-7.8104	0.01839	76.5883	-1.83865	0.03601
		77.7034	-7.97031	0.02377	78.1397	-8.24762	0.01142	77.7034	-9.94583	0.00751	77.461	-6.47219	0.0379	79.7396	-7.79224	0.01923	77.6307	-1.81298	0.03718
		78.673	-7.99034	0.0231	79.0366	-8.13932	0.01542	78.673	-9.81658	0.01264	78.4306	-6.6978	0.02822	80.6365	-8.1403	0.00314	78.6245	-2.02287	0.02762
		79.7153	-8.13431	0.01829	80.0305	-8.47228	0.00311	79.6669	-9.88398	0.00996	79.4002	-6.53585	0.03517	81.6304	-7.82053	0.01792	79.5214	-2.01673	0.0279
		80.6365	-7.94111	0.02475	81.1213	-8.18153	0.01386	80.7092	-10.1348	0	80.4183	-6.76315	0.02541	82.6729	-8.18132	0.00125	80.4911	-2.1635	0.02121
		81.6304	-7.8417	0.02807	82.0426	-8.07266	0.01789	81.6547	-9.60494	0.02105	81.388	-6.80615	0.02357	83.6185	-8.20833	0	81.485	-2.28637	0.01562
		82.6487	-8.03294	0.02168	83.0366	-8.33583	0.00815	82.6971	-9.95711	0.00706	82.4062	-6.70558	0.02788	84.6611	-8.04465	0.00756	82.5274	-2.29514	0.01522
		83.667	-8.24011	0.01475	84.0792	-8.55626	0	83.6185	-9.58207	0.02196	83.376	-6.72404	0.02709	85.6312	-7.98495	0.01032	83.473	-2.48872	0.0064
		84.6369	-8.05507	0.02094	85.0491	-8.40012	0.00578	84.6369	-9.67557	0.01824	84.3459	-7.35512	0	86.6741	-8.14965	0.00271	84.4914	-2.49135	0.00628
		85.5584	-8.28633	0.0132	85.9707	-8.4829	0.00271	85.6069	-9.75164	0.01522	85.3402	-7.02558	0.01415	87.5717	-7.93656	0.01256	85.5584	-2.58877	0.00184
		86.6499	-8.68123	0	87.038	-8.04306	0.01898	86.6013	-10.0308	0.00413	86.2618	-6.86198	0.02117				86.5286	-2.601	0.00129
		87.5717	-8.1862	0.01655	87.9841	-8.23877	0.01174	87.5231	-9.847	0.01143	87.3533	-7.0907	0.01135				87.4746	-2.62925	0
