# Supplementary material for: C-mannosylation supports folding and enhances stability of thrombospondin repeats
Source: eLife. 2019 Dec 23;8:e52978. doi: 10.7554/eLife.52978 (PMC6954052; doi:10.7554/eLife.52978)
Supplement: Figure 4—source data 1. [file elife-52978-fig4-data1.xlsx]

## Sheet: RMSF
		RMSF values from MD simulations at elevated temperatures
			#	(+) C-man (1)	(+) C-man (2)	(+) C-man (3)	(-) C-man (1)	(-) C-man (2)	(-) C-man (3)	mean, (+) C-man	mean, (-) C-man	error, (+) C-man	error, (-) C-man
		L	1	7.77122	7.393	6.70239	9.90028	11.3554	8.86924	7.28887	10.0416	0.541973	1.24908
		D	2	5.71881	5.8954	5.39287	8.24923	10.213	7.1493	5.66903	8.53717	0.254937	1.552
		G	3	3.40589	3.67222	3.12492	6.00652	7.61381	4.30342	3.40101	5.97458	0.273683	1.65543
		G	4	3.12569	2.67783	2.38995	4.82874	5.59266	2.65078	2.73116	4.35739	0.370755	1.52653
		W	5	2.68661	2.17806	1.93908	5.20177	6.65527	2.72721	2.26792	4.86142	0.381779	1.98603
		S	6	3.03542	2.51769	2.36516	3.89614	4.0663	2.32837	2.63942	3.43027	0.351319	0.958056
		S	7	3.5081	3.23735	2.96552	3.30633	4.865	2.67483	3.23699	3.61539	0.271288	1.12732
		W	8	2.69014	2.66772	2.19432	2.91248	4.56549	2.31649	2.51739	3.26482	0.280015	1.16516
		S	9	2.88887	2.47925	2.56419	2.98288	2.55769	2.38135	2.6441	2.64064	0.216186	0.309222
		D	10	3.80557	3.80656	3.39855	3.63946	3.38092	3.17134	3.67022	3.39724	0.235278	0.234487
		W	11	3.02949	3.63164	6.34631	2.46306	2.73067	2.50691	4.33582	2.56688	1.76698	0.14353
		S	12	2.9199	3.42392	4.8571	3.20004	2.94281	2.58347	3.73364	2.90877	1.00505	0.309691
		A	13	3.66896	4.68689	4.32148	3.60529	3.53226	3.16947	4.22578	3.43567	0.515668	0.233412
		C	14	2.18825	3.4608	3.61145	2.52302	2.83296	2.26933	3.08683	2.54177	0.781833	0.282282
		S	15	6.02046	6.19947	6.15937	5.9592	4.45628	4.44228	6.12643	4.95259	0.0939416	0.871782
		S	16	6.45527	5.73623	5.96273	5.84835	4.4401	4.54491	6.05141	4.94445	0.36763	0.78455
		S	17	5.46501	4.76161	4.22266	4.49379	3.72791	3.69538	4.81642	3.97236	0.62299	0.451864
		C	18	3.14101	2.94389	2.60669	2.57159	2.87295	2.25389	2.8972	2.56614	0.270202	0.309566
		H	19	4.35918	3.27575	3.97593	3.51775	3.23029	3.2271	3.87029	3.32505	0.549389	0.166893
		R	20	2.2008	3.241	4.97153	2.46453	3.0487	2.29112	3.47111	2.60145	1.39963	0.396918
		Y	21	4.08427	3.68916	4.16255	4.03271	3.40738	3.26291	3.97866	3.56767	0.253751	0.409168
		R	22	2.85018	3.01762	2.34624	2.71475	2.95697	2.25395	2.73801	2.64189	0.349463	0.357127
		T	23	2.90728	2.69924	2.7748	3.23637	3.22597	2.63632	2.79377	3.03289	0.10531	0.343473
		R	24	2.59032	2.48767	2.0819	3.68695	4.48376	2.69837	2.38663	3.62303	0.268849	0.894413
		A	25	2.74776	2.32274	2.09334	2.63901	2.5662	2.1975	2.38795	2.46757	0.332048	0.236701
		C	26	2.73855	2.08047	1.73734	3.37122	2.49228	1.93167	2.18545	2.59839	0.508797	0.725617
		T	27	5.45547	3.81075	2.89366	4.43675	5.37462	2.87398	4.05329	4.22845	1.29802	1.26327
		V	28	6.40049	4.65969	3.26655	4.94595	6.61049	4.0883	4.77558	5.21491	1.57018	1.28242
		P	29	6.38727	5.05904	3.44374	5.40345	5.87291	4.85428	4.96335	5.37688	1.47409	0.509835
		P	30	4.81408	4.95014	3.26701	4.50418	5.37139	4.26669	4.34374	4.71409	0.934956	0.581495
		P	31	4.94623	5.0618	3.81273	4.76436	5.4295	4.15095	4.60692	4.7816	0.690212	0.639447
		M	32	9.49107	8.99281	6.27776	8.31382	8.16877	7.79923	8.25388	8.09394	1.72941	0.265329
		N	33	10.4214	9.75145	7.53123	9.18849	8.98279	7.69302	9.23469	8.62143	1.51279	0.81058
		G	34	8.14342	8.2032	7.20242	7.70824	7.47313	5.29625	7.84968	6.82587	0.561339	1.3299
		G	35	6.62788	6.3798	5.65247	6.21574	5.86296	3.79272	6.22005	5.29048	0.506949	1.30903
		Q	36	6.06434	5.93758	5.02377	6.50913	6.63356	3.81918	5.67523	5.65396	0.567728	1.59018
		P	37	4.77027	4.75082	3.05396	5.33668	5.49044	2.88671	4.19168	4.57128	0.985342	1.4609
		C	38	2.76959	2.2915	1.70819	3.29545	2.63826	1.84453	2.25643	2.59275	0.531568	0.726532
		F	39	5.7568	5.90959	4.48303	6.30951	5.08751	3.90232	5.38314	5.09978	0.783254	1.20364
		G	40	5.0556	3.94568	2.96408	4.49885	3.29501	3.35664	3.98845	3.71683	1.04642	0.677944
		D	41	4.70722	3.90143	3.84331	6.00824	3.77149	4.41775	4.15065	4.73249	0.482878	1.15111
		D	42	5.59745	4.49343	5.45861	5.25959	5.19964	4.22561	5.18317	4.89495	0.601346	0.580442
		L	43	4.3252	3.52436	4.06279	5.65985	5.72931	4.8784	3.97078	5.42252	0.408273	0.4725
		M	44	3.93006	3.37549	3.51081	4.5854	5.8332	3.85741	3.60545	4.75867	0.289145	0.999226
		T	45	4.08419	3.33316	4.09235	3.2844	3.37998	2.87926	3.83657	3.18122	0.435986	0.265834
		Q	46	3.55877	3.33918	3.19902	2.93751	3.54804	3.20265	3.36566	3.2294	0.181331	0.306138
		E	47	4.81209	3.97198	5.49712	3.20226	3.3136	3.20305	4.7604	3.23964	0.763883	0.0640537
		C	48	1.93959	3.0759	3.48945	2.11083	2.7744	2.14342	2.83498	2.34288	0.802523	0.374062
		P	49	4.08065	5.08699	3.96006	3.05465	3.86495	3.13091	4.3759	3.35017	0.618765	0.447442
		A	50	4.2048	4.22018	4.64281	3.15224	3.99234	3.55485	4.35593	3.56648	0.248564	0.420175
		Q	51	5.10893	5.49726	6.19135	4.28451	5.34418	4.093	5.59918	4.5739	0.548361	0.673925
		L	52	4.03146	6.01858	6.67293	3.81578	5.40826	3.68676	5.57432	4.3036	1.37563	0.958834
		C	53	2.20132	3.24994	2.94616	2.25262	2.87353	2.43261	2.79914	2.51959	0.539548	0.319464
		T	54	3.57424	6.48105	5.76081	3.49183	5.80932	4.79144	5.27203	4.69753	1.51379	1.16159
		A	55	5.51196	6.87253	6.70397	5.85966	6.45903	5.83504	6.36282	6.05124	0.741669	0.353368
		D	56	7.32687	8.49954	7.42356	8.08767	7.93296	7.75085	7.74999	7.92383	0.650928	0.168593
		S	57	8.90432	9.30393	8.32542	8.97281	8.7673	8.61376	8.84456	8.78462	0.491984	0.18015
		T	58	10.2148	10.1071	9.67536	9.57779	10.5394	9.88395	9.99908	10.0004	0.285482	0.49129
		G	59	11.1206	10.9143	10.3274	10.1652	11.2922	10.1978	10.7874	10.5517	0.411551	0.641448
