# Supplementary material for: C-mannosylation supports folding and enhances stability of thrombospondin repeats
Source: eLife. 2019 Dec 23;8:e52978. doi: 10.7554/eLife.52978 (PMC6954052; doi:10.7554/eLife.52978)
Supplement: Figure 5—source data 1. [file elife-52978-fig5-data1.xlsx]

## Sheet: reductive denaturation
		Reductive Denaturation
		Time	(-) C-man (1)	(-) C-man (2)	(-) C-man (3)	(+) C-man (1)	(+) C-man (2)	(+) C-man (3)	(-) C-man (1)	(-) C-man (2)	(-) C-man (3)	(+) C-man (1)	(+) C-man (2)	(+) C-man (3)
		s	mdeg	mdeg	mdeg	mdeg	mdeg	mdeg	normalized	normalized	normalized	normalized	normalized	normalized
		16	15.7581	12.1528	11.0789	17.0166	14.2447	12.5992	1	0.23913	1	1	1	1
		32	15.7577	11.814	10.6194	17.0921	14.0356	12.3673	0.99998	0.23913	0.97768	0.96832	0.98616	0.98354
		48	15.4035	11.5251	10.2488	16.8256	13.8853	12.2066	0.97836	0.23913	0.95865	0.94277	0.97621	0.97213
		64	14.5163	11.1231	9.93797	16.5124	13.7722	11.9917	0.92422	0.23913	0.93218	0.92134	0.96872	0.95688
		80	14.2341	10.8089	9.33271	16.3432	13.5806	11.7404	0.907	0.23913	0.91148	0.87962	0.95604	0.93904
		96	13.8582	10.4735	9.11705	16.0718	13.4715	11.6302	0.88407	0.23913	0.88939	0.86475	0.94882	0.93122
		112	13.5664	10.1807	8.65442	15.8155	13.3605	11.4477	0.86626	0.23913	0.8701	0.83286	0.94147	0.91826
		128	13.251	9.84636	8.31535	15.5963	13.1661	11.408	0.84701	0.23913	0.84808	0.80948	0.92861	0.91544
		144	13.3032	9.54077	8.01472	15.5392	12.9964	11.1341	0.8502	0.23913	0.82795	0.78876	0.91737	0.896
		160	12.555	9.1684	7.60775	15.3871	12.826	10.936	0.80454	0.23913	0.80342	0.7607	0.9061	0.88194
		176	12.2087	8.90167	7.31532	15.2219	12.6522	10.7761	0.78341	0.23913	0.78586	0.74054	0.89459	0.87059
		192	12.0119	8.59276	6.94046	14.9109	12.568	10.5501	0.7714	0.23913	0.76551	0.7147	0.88902	0.85455
		208	11.733	8.36747	6.7454	14.6538	12.3596	10.3938	0.75438	0.23913	0.75067	0.70125	0.87522	0.84345
		224	11.2329	8.12373	6.41088	14.5319	12.1179	10.2569	0.72387	0.23913	0.73461	0.67819	0.85923	0.83373
		240	10.6953	7.77835	6.016	14.1771	11.9985	10.0218	0.69106	0.23913	0.71187	0.65097	0.85132	0.81705
		256	10.6966	7.51777	5.8281	14.0196	11.8368	9.8634	0.69114	0.23913	0.6947	0.63801	0.84062	0.8058
		272	10.2482	7.32083	5.59444	13.7321	11.73	9.63523	0.66378	0.23913	0.68173	0.6219	0.83355	0.78961
		288	9.85444	7.00064	5.34979	13.7759	11.5298	9.52403	0.63975	0.23913	0.66064	0.60504	0.8203	0.78171
		304	9.79111	6.75064	5.05893	13.425	11.3344	9.37819	0.63589	0.23913	0.64417	0.58499	0.80737	0.77136
		320	9.50949	6.56811	4.73984	13.3063	11.2048	9.18622	0.6187	0.23913	0.63215	0.56299	0.79879	0.75773
		336	9.20621	6.29391	4.48617	13.0369	11.1003	9.08138	0.60019	0.23913	0.61409	0.5455	0.79187	0.75029
		352	8.688	5.99306	4.26312	12.8764	10.9441	8.9022	0.56857	0.23913	0.59427	0.53012	0.78153	0.73757
		368	8.77672	5.81608	4.1321	12.4745	10.6953	8.70258	0.57399	0.23913	0.58261	0.52109	0.76506	0.7234
		384	8.48645	5.61288	3.91007	12.574	10.5935	8.49983	0.55627	0.23913	0.56923	0.50579	0.75832	0.70901
		400	8.25469	5.42952	3.64289	12.303	10.4659	8.34522	0.54213	0.23913	0.55715	0.48737	0.74988	0.69804
		416	8.14075	5.201	3.40265	11.9896	10.288	8.18164	0.53518	0.23913	0.5421	0.4708	0.7381	0.68642
		432	7.58623	4.97581	3.19503	11.8275	10.0559	8.06231	0.50134	0.23913	0.52727	0.45649	0.72274	0.67795
		448	7.56115	4.80324	3.05485	11.7271	9.97289	7.91929	0.49981	0.23913	0.5159	0.44683	0.71725	0.6678
		464	7.24655	4.65906	2.88671	11.3663	9.83682	7.78866	0.48061	0.23913	0.5064	0.43524	0.70824	0.65853
		480	7.15064	4.46808	2.70249	11.4376	9.62908	7.64377	0.47476	0.23913	0.49383	0.42254	0.69449	0.64824
		496	6.99935	4.19903	2.45533	11.1247	9.53782	7.40654	0.46553	0.23913	0.4761	0.4055	0.68845	0.6314
		512	6.89185	4.04425	2.30202	11.1257	9.32412	7.34024	0.45897	0.23913	0.46591	0.39493	0.6743	0.6267
		528	6.59867	3.87931	2.16804	10.7631	9.20545	7.14095	0.44108	0.23913	0.45504	0.38569	0.66645	0.61255
		544	6.37819	3.84523	2.05442	10.724	9.12754	7.07127	0.42762	0.23913	0.4528	0.37786	0.66129	0.60761
		560	6.06086	3.59355	1.80121	10.6396	8.89009	6.87478	0.40826	0.23913	0.43622	0.3604	0.64557	0.59366
		576	6.11404	3.33578	1.75486	10.4253	8.75022	6.74331	0.4115	0.23913	0.41924	0.35721	0.63632	0.58433
		592	6.097	3.32884	1.57843	10.2698	8.60109	6.59994	0.41046	0.23913	0.41879	0.34504	0.62645	0.57415
		608	5.89916	3.12258	1.46964	10.1969	8.45795	6.45338	0.39839	0.23913	0.4052	0.33754	0.61697	0.56375
		624	5.7045	3.09106	1.2781	9.98528	8.39923	6.31017	0.38651	0.23913	0.40312	0.32434	0.61308	0.55358
		640	5.35981	2.85268	1.14148	9.7814	8.20831	6.1568	0.36548	0.23913	0.38742	0.31492	0.60045	0.54269
		656	5.44094	2.68174	0.99323	9.52244	8.07412	6.03462	0.37043	0.23913	0.37616	0.3047	0.59156	0.53402
		672	5.26861	2.56496	0.93905	9.53072	7.936	5.93309	0.35992	0.23913	0.36847	0.30096	0.58242	0.52681
		688	4.7343	2.4475	0.80675	9.3682	7.77531	5.80813	0.32731	0.23913	0.36073	0.29184	0.57179	0.51794
		704	4.80575	2.26581	0.72885	9.21295	7.6721	5.73445	0.33167	0.23913	0.34877	0.28647	0.56495	0.51271
		720	4.73434	2.21085	0.58543	9.04026	7.52367	5.56436	0.32731	0.23913	0.34515	0.27659	0.55513	0.50064
		736	4.44405	2.03081	0.54639	8.90707	7.45961	5.37317	0.3096	0.23913	0.33329	0.27389	0.55089	0.48707
		752	4.62249	1.96934	0.44523	8.76699	7.30719	5.28792	0.32049	0.23913	0.32924	0.26692	0.5408	0.48102
		768	4.37482	1.75657	0.24492	8.67137	7.13316	5.17829	0.30537	0.23913	0.31522	0.25311	0.52928	0.47324
		784	4.21853	1.72195	0.18379	8.40634	7.05654	5.02384	0.29584	0.23913	0.31294	0.2489	0.52421	0.46227
		800	4.18915	1.59249	0.18332	8.39638	6.97193	4.90896	0.29404	0.23913	0.30442	0.24886	0.51861	0.45412
		816	4.04657	1.45851	-0.01402	8.23259	6.76683	4.80125	0.28534	0.23913	0.29559	0.23526	0.50503	0.44647
		832	4.05061	1.37819	-0.06306	8.19213	6.62219	4.69373	0.28559	0.23913	0.2903	0.23188	0.49546	0.43884
		848	3.76388	1.36932	-0.14669	8.04379	6.51528	4.5465	0.26809	0.23913	0.28972	0.22611	0.48838	0.42839
		864	3.60513	1.19328	-0.27146	7.83394	6.39293	4.46743	0.25841	0.23913	0.27812	0.21751	0.48029	0.42278
		880	3.63044	1.06298	-0.37907	7.5171	6.32097	4.40821	0.25995	0.23913	0.26954	0.21009	0.47552	0.41857
		896	3.49916	1.00041	-0.49939	7.66777	6.18464	4.31517	0.25194	0.23913	0.26542	0.2018	0.4665	0.41197
		912	3.32242	0.94799	-0.54185	7.42674	6.11662	4.20371	0.24116	0.23913	0.26197	0.19887	0.462	0.40406
		928	3.1709	0.83929	-0.56621	7.4394	5.94761	3.99731	0.23191	0.23913	0.25481	0.19719	0.45081	0.3894
		944	3.23243	0.74219	-0.68744	7.26924	5.7971	3.95652	0.23566	0.23913	0.24841	0.18884	0.44085	0.38651
		960	3.07136	0.71935	-0.77632	7.24519	5.78649	3.93394	0.22584	0.23913	0.24691	0.18271	0.44014	0.38491
		976	3.2311	0.58795	-0.80806	6.96189	5.6479	3.76773	0.23558	0.23913	0.23825	0.18052	0.43097	0.37311
		992	3.01356	0.51945	-0.877	6.75479	5.53298	3.7176	0.22231	0.23913	0.23374	0.17577	0.42336	0.36955
		1008	2.98112	0.39411	-1.00223	6.90772	5.36577	3.64902	0.22033	0.23913	0.22548	0.16713	0.4123	0.36468
		1024	2.83991	0.32813	-1.00611	6.68852	5.34155	3.51797	0.21171	0.23913	0.22114	0.16687	0.41069	0.35538
		1040	2.6472	0.31757	-1.05181	6.52472	5.19821	3.51852	0.19995	0.23913	0.22044	0.16372	0.40121	0.35542
		1056	2.51976	0.21292	-1.0917	6.3654	5.16076	3.37992	0.19218	0.23913	0.21355	0.16097	0.39873	0.34558
		1072	2.63005	0.02882	-1.15894	6.41594	4.95321	3.30877	0.19891	0.23913	0.20142	0.15633	0.38499	0.34053
		1088	2.44937	0.09099	-1.25593	6.38038	4.91343	3.21694	0.18788	0.23913	0.20552	0.14964	0.38236	0.33401
		1104	2.39642	-0.04734	-1.3016	6.17806	4.79025	3.08017	0.18465	0.23913	0.1964	0.1465	0.3742	0.3243
		1120	2.26255	-0.10044	-1.30764	6.14357	4.70041	2.95188	0.17648	0.23913	0.19291	0.14608	0.36826	0.3152
		1136	2.30484	-0.17801	-1.38124	6.02273	4.68113	2.97884	0.17906	0.23913	0.1878	0.14101	0.36698	0.31711
		1152	2.46484	-0.24364	-1.45771	6.02166	4.52224	2.85337	0.18882	0.23913	0.18347	0.13573	0.35646	0.3082
		1168	2.04419	-0.24362	-1.4186	5.9296	4.48846	2.73435	0.16316	0.23913	0.18348	0.13843	0.35423	0.29975
		1184	1.9778	-0.30306	-1.5158	5.55123	4.37532	2.598	0.1591	0.23913	0.17956	0.13173	0.34674	0.29008
		1200	2.19351	-0.36804	-1.62999	5.78693	4.24895	2.5547	0.17227	0.23913	0.17528	0.12386	0.33837	0.287
		1216	2.06082	-0.43731	-1.7206	5.61703	4.24464	2.59332	0.16417	0.23913	0.17072	0.11761	0.33809	0.28974
		1232	2.07731	-0.4753	-1.70407	5.53229	4.07753	2.42958	0.16518	0.23913	0.16822	0.11875	0.32703	0.27812
		1248	1.93199	-0.60715	-1.75112	5.35123	4.01386	2.35462	0.15631	0.23913	0.15953	0.11551	0.32281	0.2728
		1264	1.75368	-0.60161	-1.85956	5.28205	3.92199	2.27415	0.14543	0.23913	0.1599	0.10803	0.31673	0.26709
		1280	1.77489	-0.68491	-1.83634	5.3269	3.91651	2.19639	0.14672	0.23913	0.15441	0.10963	0.31637	0.26157
		1296	1.69008	-0.67108	-1.74024	5.24895	3.75948	2.12213	0.14155	0.23913	0.15532	0.11626	0.30598	0.2563
		1312	1.70629	-0.7895	-1.84774	4.99159	3.72313	2.06446	0.14254	0.23913	0.14752	0.10884	0.30357	0.2522
		1328	1.62621	-0.88061	-1.91488	4.88059	3.63104	2.03508	0.13765	0.23913	0.14152	0.10422	0.29747	0.25012
		1344	1.54892	-0.9303	-1.9403	5.00779	3.52127	2.02884	0.13293	0.23913	0.13825	0.10246	0.29021	0.24968
		1360	1.56931	-0.97348	-2.0025	4.67632	3.46198	1.94141	0.13418	0.23913	0.1354	0.09818	0.28628	0.24347
		1376	1.3287	-0.97222	-2.05002	4.63639	3.40598	1.92325	0.1195	0.23913	0.13549	0.0949	0.28258	0.24218
		1392	1.49485	-1.0133	-2.07498	4.79477	3.39925	1.74308	0.12963	0.23913	0.13278	0.09318	0.28213	0.22939
		1408	1.39226	-1.02661	-2.07365	4.43793	3.21505	1.71591	0.12337	0.23913	0.1319	0.09327	0.26994	0.22746
		1424	1.25297	-1.12973	-2.16962	4.39394	3.21158	1.6243	0.11487	0.23913	0.12511	0.08665	0.26971	0.22096
		1440	1.21266	-1.18938	-2.21976	4.44173	3.05775	1.55986	0.11241	0.23913	0.12118	0.0832	0.25953	0.21639
		1456	1.30042	-1.22152	-2.19284	4.44649	2.97982	1.53278	0.11777	0.23913	0.11906	0.08505	0.25437	0.21446
		1472	1.18451	-1.08853	-2.23056	4.54322	3.01978	1.50071	0.1107	0.23913	0.12782	0.08245	0.25701	0.21219
		1488	1.14789	-1.18783	-2.23588	4.25472	2.92443	1.36614	0.10846	0.23913	0.12128	0.08209	0.2507	0.20263
		1504	1.27766	-1.24624	-2.28367	4.40895	2.87351	1.30179	0.11638	0.23913	0.11744	0.07879	0.24733	0.19807
		1520	1.08755	-1.31886	-2.27783	4.17243	2.75593	1.32245	0.10478	0.23913	0.11265	0.07919	0.23955	0.19953
		1536	1.09529	-1.36288	-2.37902	4.16767	2.80135	1.2079	0.10525	0.23913	0.10975	0.07222	0.24256	0.1914
		1552	1.12936	-1.35733	-2.35236	4.07398	2.6109	1.20289	0.10733	0.23913	0.11012	0.07406	0.22995	0.19105
		1568	1.00121	-1.4783	-2.33035	3.9428	2.49687	1.15326	0.09951	0.23913	0.10215	0.07557	0.2224	0.18752
		1584	1.02323	-1.42359	-2.36513	3.80375	2.52235	1.10701	0.10086	0.23913	0.10575	0.07318	0.22409	0.18424
		1600	1.00877	-1.49801	-2.40145	3.98355	2.43388	1.06907	0.09997	0.23913	0.10085	0.07067	0.21823	0.18155
		1616	0.82048	-1.55774	-2.43565	3.80914	2.3634	1.03722	0.08848	0.23913	0.09692	0.06831	0.21357	0.17929
		1632	0.80648	-1.57651	-2.41575	3.55696	2.31913	0.93955	0.08763	0.23913	0.09568	0.06969	0.21064	0.17235
		1648	0.71301	-1.58623	-2.48481	3.72626	2.29027	0.90301	0.08193	0.23913	0.09504	0.06493	0.20873	0.16976
		1664	1.03368	-1.68017	-2.46167	3.69405	2.22348	0.83037	0.10149	0.23913	0.08885	0.06652	0.20431	0.1646
		1680	0.86013	-1.63672	-2.57356	3.68728	2.18941	0.78919	0.0909	0.23913	0.09172	0.05881	0.20205	0.16168
		1696	0.78269	-1.72441	-2.51898	3.50087	2.14442	0.76117	0.08618	0.23913	0.08594	0.06257	0.19907	0.15969
		1712	0.61841	-1.69963	-2.58174	3.69299	2.06645	0.78296	0.07615	0.23913	0.08757	0.05824	0.19391	0.16124
		1728	0.64089	-1.71671	-2.5532	3.41953	1.94473	0.70891	0.07752	0.23913	0.08645	0.06021	0.18586	0.15598
		1744	0.92583	-1.78025	-2.58663	3.515	2.00299	0.6351	0.09491	0.23913	0.08226	0.05791	0.18971	0.15074
		1760	0.78317	-1.82382	-2.64111	3.20384	1.91102	0.55818	0.08621	0.23913	0.07939	0.05415	0.18362	0.14528
		1776	0.8105	-1.80617	-2.62939	3.20833	1.86394	0.54272	0.08787	0.23913	0.08055	0.05496	0.18051	0.14418
		1792	0.513	-1.91527	-2.67689	3.121	1.81974	0.45793	0.06972	0.23913	0.07337	0.05168	0.17758	0.13817
		1808	0.59043	-1.85319	-2.65883	3.15445	1.7217	0.39896	0.07445	0.23913	0.07746	0.05293	0.17109	0.13398
		1824	0.46648	-1.87949	-2.70601	3.15627	1.68607	0.34084	0.06688	0.23913	0.07573	0.04968	0.16873	0.12985
		1840	0.62131	-1.90644	-2.69198	3.08509	1.64522	0.41035	0.07633	0.23913	0.07395	0.05064	0.16603	0.13479
		1856	0.64913	-1.92629	-2.75488	2.94801	1.58147	0.38826	0.07803	0.23913	0.07264	0.04631	0.16181	0.13322
		1872	0.38113	-2.02393	-2.73839	3.01039	1.56788	0.31684	0.06167	0.23913	0.06621	0.04744	0.16091	0.12815
		1888	0.50315	-2.01128	-2.78539	2.83889	1.56393	0.30475	0.06912	0.23913	0.06704	0.0442	0.16065	0.12729
		1904	0.51911	-1.94605	-2.65853	2.81901	1.40607	0.27538	0.07009	0.23913	0.07134	0.05295	0.1502	0.12521
		1920	0.38816	-2.04652	-2.77952	2.94414	1.44062	0.19336	0.0621	0.23913	0.06472	0.04461	0.15249	0.11939
		1936	0.31164	-2.02553	-2.78521	2.75375	1.34464	0.11343	0.05743	0.23913	0.06611	0.04422	0.14614	0.11371
		1952	0.25496	-2.08197	-2.75214	2.68076	1.30261	0.14963	0.05397	0.23913	0.06239	0.0465	0.14335	0.11628
		1968	0.49357	-2.02001	-2.89644	2.70014	1.31569	0.11612	0.06853	0.23913	0.06647	0.03655	0.14422	0.1139
		1984	0.39502	-2.03568	-2.8988	2.68583	1.21282	0.05827	0.06252	0.23913	0.06544	0.03639	0.13741	0.1098
		2000	0.02726	-2.1449	-2.86846	2.51878	1.16309	0.04391	0.04008	0.23913	0.05824	0.03848	0.13412	0.10878
		2016	0.38905	-2.1088	-2.85205	2.58969	1.20162	0.04703	0.06216	0.23913	0.06062	0.03961	0.13667	0.109
		2032	0.12894	-2.20404	-2.90184	2.64322	1.08708	0.00666	0.04628	0.23913	0.05435	0.03618	0.12909	0.10613
		2048	0.3684	-2.12616	-2.8986	2.50837	1.08353	-0.08387	0.0609	0.23913	0.05948	0.0364	0.12885	0.09971
		2064	0.24933	-2.1921	-3.01475	2.41843	1.06296	-0.10863	0.05363	0.23913	0.05513	0.02839	0.12749	0.09795
		2080	0.11805	-2.24227	-2.91648	2.51384	1.0209	-0.06618	0.04562	0.23913	0.05183	0.03517	0.12471	0.10096
		2096	0.31288	-2.20043	-2.98577	2.45416	0.92201	-0.11155	0.05751	0.23913	0.05459	0.03039	0.11816	0.09774
		2112	0.34326	-2.23277	-2.98569	2.59295	0.98825	-0.13986	0.05936	0.23913	0.05246	0.0304	0.12255	0.09573
		2128	0.18239	-2.25418	-2.99484	2.38001	0.86565	-0.13986	0.04955	0.23913	0.05105	0.02976	0.11443	0.09573
		2144	0.14485	-2.29161	-2.95406	2.27969	0.88716	-0.27118	0.04726	0.23913	0.04858	0.03258	0.11585	0.08641
		2160	0.21152	-2.30814	-2.94287	2.33215	0.79535	-0.24974	0.05132	0.23913	0.04749	0.03335	0.10978	0.08793
		2176	0.36975	-2.27314	-3.05559	2.29238	0.81454	-0.25349	0.06098	0.23913	0.0498	0.02558	0.11105	0.08767
		2192	0.3785	-2.23919	-2.95343	2.28315	0.72334	-0.32052	0.06151	0.23913	0.05203	0.03262	0.10501	0.08291
		2208	0.04321	-2.29042	-2.99619	2.36364	0.74045	-0.33862	0.04105	0.23913	0.04866	0.02967	0.10614	0.08162
		2224	0.02308	-2.3121	-2.98998	2.26186	0.55698	-0.36133	0.03983	0.23913	0.04723	0.0301	0.094	0.08001
		2240	-0.19825	-2.35505	-3.01096	2.29493	0.71429	-0.42439	0.02632	0.23913	0.0444	0.02865	0.10441	0.07554
		2256	-0.06056	-2.33693	-3.01149	2.06468	0.64873	-0.34968	0.03472	0.23913	0.04559	0.02862	0.10007	0.08084
		2272	0.1296	-2.28851	-3.09099	2.01306	0.56605	-0.4167	0.04632	0.23913	0.04878	0.02314	0.0946	0.07608
		2288	0.04004	-2.39783	-3.09431	1.99104	0.57152	-0.49477	0.04086	0.23913	0.04158	0.02291	0.09496	0.07054
		2304	0.10138	-2.39813	-2.98825	1.89939	0.56758	-0.52456	0.0446	0.23913	0.04156	0.03022	0.0947	0.06843
		2320	0.00789	-2.38526	-3.09014	2.03473	0.56134	-0.46024	0.0389	0.23913	0.04241	0.02319	0.09429	0.07299
		2336	0.03609	-2.49665	-3.04304	1.98553	0.45509	-0.51059	0.04062	0.23913	0.03507	0.02644	0.08726	0.06942
		2352	0.0278	-2.49312	-3.09497	2.1469	0.51474	-0.55183	0.04011	0.23913	0.03531	0.02286	0.0912	0.06649
		2368	0.04377	-2.42425	-3.13207	1.97484	0.40452	-0.59328	0.04109	0.23913	0.03984	0.0203	0.08391	0.06355
		2384	-0.01124	-2.44601	-2.9955	1.87828	0.38663	-0.57394	0.03773	0.23913	0.03841	0.02972	0.08272	0.06492
		2400	0.02741	-2.50219	-3.12332	1.91072	0.34726	-0.60687	0.04009	0.23913	0.03471	0.02091	0.08012	0.06258
		2416	-0.06309	-2.50897	-3.14298	1.82456	0.32768	-0.65669	0.03457	0.23913	0.03426	0.01955	0.07882	0.05905
		2432	-0.22376	-2.55655	-3.07957	1.81676	0.32229	-0.64736	0.02476	0.23913	0.03113	0.02392	0.07846	0.05971
		2448	0.12893	-2.5127	-3.08633	1.84127	0.22914	-0.65801	0.04628	0.23913	0.03402	0.02346	0.0723	0.05895
		2464	-0.06348	-2.53487	-3.12039	1.71185	0.26565	-0.72325	0.03454	0.23913	0.03256	0.02111	0.07472	0.05432
		2480	-0.11709	-2.4978	-3.16488	1.67946	0.20416	-0.75162	0.03127	0.23913	0.035	0.01804	0.07065	0.05231
		2496	0.14882	-2.47063	-3.07432	1.71518	0.20835	-0.73146	0.0475	0.23913	0.03679	0.02429	0.07092	0.05374
		2512	-0.01025	-2.53291	-3.13969	1.60764	0.20337	-0.67775	0.03779	0.23913	0.03269	0.01978	0.07059	0.05755
		2528	0.01399	-2.56223	-3.17285	1.63305	0.1164	-0.76257	0.03927	0.23913	0.03075	0.01749	0.06484	0.05153
		2544	-0.08514	-2.57797	-3.141	1.71977	0.12977	-0.78973	0.03322	0.23913	0.02972	0.01969	0.06572	0.0496
		2560	-0.00788	-2.62187	-3.12952	1.46414	0.08325	-0.75606	0.03794	0.23913	0.02683	0.02048	0.06264	0.05199
		2576	-0.31259	-2.56291	-3.10054	1.36367	0.0553	-0.78005	0.01934	0.23913	0.03071	0.02248	0.06079	0.05029
		2592	-0.06799	-2.54062	-3.19898	1.55683	0.03485	-0.79947	0.03427	0.23913	0.03218	0.01569	0.05944	0.04891
		2608	-0.02956	-2.62385	-3.23548	1.44786	0.04801	-0.84433	0.03661	0.23913	0.0267	0.01318	0.06031	0.04573
		2624	-0.10424	-2.65778	-3.18198	1.72693	-0.01232	-0.80358	0.03206	0.23913	0.02446	0.01686	0.05632	0.04862
		2640	-0.16612	-2.66456	-3.11979	1.55217	0.02254	-0.78699	0.02828	0.23913	0.02401	0.02115	0.05862	0.0498
		2656	-0.13536	-2.57707	-3.26981	1.5303	-0.04593	-0.85353	0.03016	0.23913	0.02978	0.01081	0.05409	0.04507
		2672	-0.00926	-2.67007	-3.12713	1.57468	-0.05136	-0.93242	0.03785	0.23913	0.02365	0.02064	0.05373	0.03947
		2688	-0.11623	-2.70156	-3.17893	1.49132	-0.05909	-0.97693	0.03132	0.23913	0.02158	0.01707	0.05322	0.03631
		2704	-0.25253	-2.61088	-3.10072	1.37471	-0.14993	-0.87922	0.02301	0.23913	0.02755	0.02247	0.04721	0.04325
		2720	-0.10203	-2.6519	-3.16216	1.41983	-0.16352	-0.85219	0.03219	0.23913	0.02485	0.01823	0.04631	0.04517
		2736	-0.18587	-2.64726	-3.214	1.42032	-0.10109	-0.98721	0.02707	0.23913	0.02515	0.01466	0.05044	0.03558
		2752	-0.35675	-2.61834	-3.11829	1.39872	-0.18612	-0.96183	0.01665	0.23913	0.02706	0.02125	0.04481	0.03739
		2768	-0.12621	-2.7361	-3.22726	1.34858	-0.09276	-1.00277	0.03072	0.23913	0.0193	0.01374	0.05099	0.03448
		2784	-0.18313	-2.70478	-3.26949	1.38907	-0.18534	-1.05502	0.02724	0.23913	0.02137	0.01083	0.04486	0.03077
		2800	-0.26915	-2.66334	-3.31157	1.43348	-0.2073	-0.94097	0.02199	0.23913	0.0241	0.00793	0.04341	0.03887
		2816	-0.0819	-2.7123	-3.27962	1.49984	-0.23283	-0.99724	0.03342	0.23913	0.02087	0.01013	0.04172	0.03487
		2832	-0.35536	-2.77523	-3.24705	1.48703	-0.23328	-1.1344	0.01673	0.23913	0.01673	0.01238	0.04169	0.02514
		2848	-0.15589	-2.69444	-3.20905	1.27116	-0.24396	-1.0308	0.0289	0.23913	0.02205	0.015	0.04098	0.03249
		2864	-0.47475	-2.73894	-3.27423	1.24075	-0.2971	-1.02985	0.00945	0.23913	0.01912	0.0105	0.03747	0.03256
		2880	-0.30449	-2.72456	-3.25164	1.32094	-0.29943	-1.09717	0.01984	0.23913	0.02006	0.01206	0.03731	0.02778
		2896	-0.35762	-2.7577	-3.25714	0.99296	-0.34989	-1.07473	0.01659	0.23913	0.01788	0.01168	0.03397	0.02937
		2912	-0.21138	-2.76425	-3.29772	1.4575	-0.2807	-1.11572	0.02552	0.23913	0.01745	0.00888	0.03855	0.02646
		2928	-0.31313	-2.70223	-3.21324	1.39344	-0.39014	-1.21397	0.01931	0.23913	0.02153	0.01471	0.03131	0.01949
		2944	-0.29383	-2.79541	-3.25109	1.39698	-0.37993	-1.11096	0.02049	0.23913	0.0154	0.0121	0.03198	0.0268
		2960	-0.2574	-2.78282	-3.20289	1.17096	-0.34922	-1.11064	0.02271	0.23913	0.01623	0.01542	0.03402	0.02682
		2976	-0.07616	-2.81316	-3.29561	1.06722	-0.36538	-1.10659	0.03377	0.23913	0.01423	0.00903	0.03295	0.02711
		2992	-0.16984	-2.79931	-3.24706	1.14324	-0.38737	-1.05724	0.02805	0.23913	0.01514	0.01238	0.03149	0.03061
		3008	-0.28277	-2.72079	-3.30959	0.97991	-0.46512	-1.17036	0.02116	0.23913	0.02031	0.00807	0.02635	0.02258
		3024	-0.35434	-2.79199	-3.29204	1.20453	-0.43338	-1.19678	0.01679	0.23913	0.01562	0.00928	0.02845	0.02071
		3040	-0.44698	-2.76631	-3.2123	1.11184	-0.48203	-1.23893	0.01114	0.23913	0.01731	0.01477	0.02523	0.01772
		3056	-0.30106	-2.75389	-3.22165	1.04903	-0.51626	-1.18811	0.02005	0.23913	0.01813	0.01413	0.02296	0.02132
		3072	-0.51208	-2.81217	-3.20561	0.96062	-0.53288	-1.28812	0.00717	0.23913	0.01429	0.01523	0.02186	0.01422
		3088	-0.31424	-2.82538	-3.19743	1.1555	-0.47136	-1.19962	0.01924	0.23913	0.01342	0.0158	0.02593	0.02051
		3104	-0.38509	-2.8189	-3.28371	0.91699	-0.49219	-1.1753	0.01492	0.23913	0.01385	0.00985	0.02455	0.02223
		3120	-0.31289	-2.83627	-3.30854	1.06236	-0.48725	-1.20322	0.01932	0.23913	0.0127	0.00814	0.02488	0.02025
		3136	-0.41722	-2.80149	-3.29915	1.02376	-0.51979	-1.20779	0.01296	0.23913	0.015	0.00879	0.02273	0.01993
		3152	-0.09202	-2.83596	-3.2753	0.99141	-0.50835	-1.19224	0.0328	0.23913	0.01272	0.01043	0.02348	0.02103
		3168	-0.28236	-2.81803	-3.24829	1.02975	-0.53464	-1.23651	0.02119	0.23913	0.01391	0.01229	0.02174	0.01789
		3184	-0.26625	-2.77678	-3.3457	1.01333	-0.59404	-1.26392	0.02217	0.23913	0.01662	0.00558	0.01781	0.01594
		3200	-0.42493	-2.87963	-3.23697	0.94813	-0.59351	-1.31891	0.01249	0.23913	0.00985	0.01307	0.01785	0.01204
		3216	-0.47911	-2.81894	-3.24867	1.15316	-0.5884	-1.30283	0.00918	0.23913	0.01385	0.01227	0.01819	0.01318
		3232	-0.24393	-2.84204	-3.2789	0.87267	-0.62225	-1.27054	0.02353	0.23913	0.01232	0.01018	0.01594	0.01547
		3248	-0.45741	-2.8067	-3.27114	0.96581	-0.5787	-1.32755	0.0105	0.23913	0.01465	0.01072	0.01883	0.01143
		3264	-0.24551	-2.79223	-3.25907	1.01773	-0.63002	-1.31872	0.02344	0.23913	0.01561	0.01155	0.01543	0.01205
		3280	-0.48924	-2.92809	-3.25487	0.96931	-0.72184	-1.36432	0.00856	0.23913	0.00666	0.01184	0.00935	0.00882
		3296	-0.29683	-2.8705	-3.28803	1.01444	-0.66338	-1.26105	0.0203	0.23913	0.01045	0.00955	0.01322	0.01615
		3312	-0.13662	-2.92363	-3.32811	0.91507	-0.67273	-1.33556	0.03008	0.23913	0.00695	0.00679	0.0126	0.01086
		3328	-0.35872	-2.86894	-3.35264	0.88476	-0.69158	-1.29239	0.01653	0.23913	0.01055	0.0051	0.01136	0.01392
		3344	-0.3133	-2.93944	-3.35152	0.9143	-0.72626	-1.32142	0.0193	0.23913	0.00591	0.00518	0.00906	0.01186
		3360	-0.30663	-3.02915	-3.35647	1.05927	-0.72563	-1.37989	0.01971	0.23913	0	0.00483	0.0091	0.00771
		3376	-0.15252	-2.8379	-3.32293	0.77812	-0.75648	-1.34298	0.02911	0.23913	0.0126	0.00715	0.00706	0.01033
		3392	-0.53787	-2.86883	-3.40373	0.87907	-0.67359	-1.35826	0.00559	0.23913	0.01056	0.00158	0.01255	0.00925
		3408	-0.45809	-2.82969	-3.28722	0.93192	-0.75761	-1.44417	0.01046	0.23913	0.01314	0.00961	0.00699	0.00315
		3424	-0.3223	-2.91427	-3.34752	0.77523	-0.75985	-1.34941	0.01875	0.23913	0.00757	0.00545	0.00684	0.00987
		3440	-0.45729	-2.86049	-3.31984	0.85679	-0.7804	-1.3634	0.01051	0.23913	0.01111	0.00736	0.00548	0.00888
		3456	-0.26431	-2.94034	-3.31735	0.74083	-0.81985	-1.36129	0.02229	0.23913	0.00585	0.00753	0.00287	0.00903
		3472	-0.32723	-2.90932	-3.27017	0.72181	-0.77747	-1.46193	0.01845	0.23913	0.00789	0.01078	0.00567	0.00189
		3488	-0.21305	-2.9732	-3.23338	0.76439	-0.80266	-1.44127	0.02542	0.23913	0.00369	0.01332	0.004	0.00335
		3504	-0.46266	-2.92614	-3.35657	0.8219	-0.81586	-1.32402	0.01018	0.23913	0.00679	0.00483	0.00313	0.01168
		3520	-0.42511	-3.00472	-3.32036	0.77983	-0.82486	-1.36717	0.01248	0.23913	0.00161	0.00732	0.00253	0.00861
		3536	-0.41328	-2.8767	-3.32694	0.86929	-0.81003	-1.35475	0.0132	0.23913	0.01004	0.00687	0.00352	0.00949
		3552	-0.62956	-2.91451	-3.42659	0.87092	-0.83252	-1.48851	0	0.23913	0.00755	0	0.00203	0
		3568	-0.51534	-2.87028	-3.23386	0.7403	-0.83458	-1.41573	0.00697	0.23913	0.01046	0.01329	0.00189	0.00517
		3584	-0.44138	-2.96965	-3.38009	0.88069	-0.85899	-1.38718	0.01148	0.23913	0.00392	0.00321	0.000275089	0.00719
		3600	-0.38125	-2.8713	-3.34024	0.74987	-0.86315	-1.46164	0.01515	0.23913	0.0104	0.00595	0	0.00191
