# Supplementary material for: C-mannosylation supports folding and enhances stability of thrombospondin repeats
Source: eLife. 2019 Dec 23;8:e52978. doi: 10.7554/eLife.52978 (PMC6954052; doi:10.7554/eLife.52978)
Supplement: Figure 5—source data 2. [file elife-52978-fig5-data2.xlsx]

## Sheet: RMSF
		RMSF values from MD simulations of TSR2 lacking disulfide bridges
		#	#	(+) C-man (1)	(+) C-man (2)	(+) C-man (3)	(-) C-man (1)	(-) C-man (2)	(-) C-man (3)	mean, (+) C-man	mean, (-) C-man	error, (+) C-man	error, (-) C-man
		L	1	7.31311	9.44259	7.84106	12.9309	7.83905	9.97325	8.19892	10.2477	1.10892	2.557
		D	2	5.85074	7.28906	5.22797	11.4041	6.58233	6.73234	6.12259	8.2396	1.05709	2.74158
		G	3	3.58477	4.99962	3.39106	8.37624	4.26631	6.70495	3.99182	6.44916	0.87814	2.06687
		G	4	2.41038	3.95057	2.48205	6.75204	2.9902	5.16403	2.94767	4.96876	0.86928	1.88851
		W	5	2.06561	2.78599	1.80047	6.50085	3.04936	4.89317	2.21736	4.81446	0.509986	1.72709
		S	6	2.08034	3.36777	2.04353	3.57577	3.15059	3.30924	2.49721	3.3452	0.754151	0.214855
		S	7	2.55109	4.08881	2.16318	5.48018	3.64636	4.46251	2.93436	4.52968	1.01842	0.918752
		W	8	2.42361	2.54315	1.6546	3.89825	3.35115	2.68358	2.20712	3.31099	0.482215	0.60833
		S	9	2.53878	3.37698	2.10795	5.76204	2.23071	4.05526	2.67457	4.016	0.645319	1.76599
		D	10	3.37752	5.15641	2.99548	7.47496	3.24322	5.32608	3.84314	5.34809	1.15326	2.11596
		W	11	2.44225	3.33499	1.84696	3.67875	3.0972	2.64732	2.5414	3.14109	0.748953	0.517118
		S	12	4.05293	5.2253	2.80869	6.55259	3.39882	5.74714	4.02898	5.23285	1.20849	1.63857
		A	13	5.02289	6.90164	3.86727	7.59473	4.22192	6.52118	5.26393	6.11261	1.53148	1.72313
		C	14	6.63882	6.08197	3.13803	4.11418	6.27402	6.59184	5.28628	5.66002	1.88115	1.34813
		S	15	7.30221	6.81068	4.00003	6.99369	6.09996	9.4138	6.03764	7.50248	1.78165	1.71451
		S	16	7.103	7.80867	4.69296	7.05904	5.67188	9.64001	6.53488	7.45698	1.63371	2.01377
		S	17	7.51775	7.14827	4.24055	4.34089	5.53891	8.38569	6.30219	6.0885	1.79497	2.07765
		C	18	4.38518	5.45962	3.49317	5.58626	5.02698	6.96063	4.44599	5.85795	0.984636	0.995045
		H	19	4.74889	5.12134	3.50599	6.67446	5.01987	7.11954	4.45874	6.27129	0.845862	1.10637
		R	20	3.2421	4.29865	2.25779	3.11144	3.44668	2.73276	3.26618	3.09696	1.02065	0.357183
		Y	21	4.32292	5.33507	2.99432	6.60114	4.3756	6.28145	4.21743	5.75273	1.17394	1.2033
		R	22	2.8877	2.70607	1.97464	3.45826	2.84472	2.42976	2.5228	2.91091	0.48333	0.51744
		T	23	2.80848	3.65004	2.48338	5.53241	2.62078	4.38328	2.98064	4.17882	0.602082	1.46654
		R	24	2.30956	2.75035	1.76196	4.06103	3.38332	2.71518	2.27396	3.38651	0.495154	0.672932
		A	25	2.01661	2.7294	1.99117	4.62809	2.3925	3.89551	2.24573	3.6387	0.419063	1.13971
		C	26	1.95204	2.40052	2.35739	7.02022	2.65325	5.8343	2.23665	5.16926	0.247419	2.25817
		T	27	3.22938	3.94457	2.92968	8.39708	3.35753	7.8506	3.36787	6.53507	0.521426	2.76536
		V	28	4.30579	5.23612	4.08521	10.1599	4.5747	8.82292	4.54237	7.85251	0.610841	2.91631
		P	29	5.1318	5.99375	4.66105	9.51013	4.18648	6.72895	5.2622	6.80852	0.675855	2.66271
		P	30	4.12761	4.93695	3.82491	9.08537	3.64	8.39561	4.29649	7.04033	0.57493	2.9649
		P	31	4.43051	4.87686	3.74929	5.86175	3.01711	5.38672	4.35222	4.75519	0.567844	1.52385
		M	32	7.24159	8.63155	7.19882	12.1296	5.33101	9.26973	7.69066	8.91012	0.815121	3.41354
		N	33	7.54261	8.41446	7.30859	11.0848	5.47049	8.83665	7.75522	8.46399	0.582785	2.82565
		G	34	6.36918	6.55276	5.83855	6.70156	4.68107	6.00299	6.2535	5.79521	0.370891	1.02615
		G	35	5.74341	5.60369	5.6202	4.54655	4.88956	4.33937	5.65576	4.59183	0.0763492	0.277874
		Q	36	7.22474	6.78244	6.64888	4.83725	6.99939	4.91243	6.88536	5.58302	0.30141	1.22719
		P	37	4.26026	4.59712	4.77379	4.51408	4.93197	4.42121	4.54372	4.62242	0.260894	0.272069
		C	38	5.8541	4.97142	5.87105	5.82886	4.78587	6.11387	5.56552	5.5762	0.514579	0.699123
		F	39	5.74834	7.8754	5.48831	9.1165	6.19828	8.51941	6.37068	7.94473	1.30959	1.54166
		G	40	2.88999	6.39043	3.23088	7.45062	5.51781	7.1117	4.17043	6.69338	1.93011	1.03208
		D	41	3.31229	7.95122	3.37985	10.9699	7.99251	6.82092	4.88112	8.59443	2.659	2.13897
		D	42	5.87116	7.50398	4.3807	10.0947	9.66944	7.13163	5.91861	8.96524	1.56218	1.60212
		L	43	4.52474	5.60752	2.90811	6.92709	8.2236	5.94364	4.34679	7.03144	1.35848	1.14355
		M	44	3.97003	4.55601	3.33391	5.72027	5.06194	4.36	3.95332	5.04741	0.611219	0.68025
		T	45	4.2152	4.44182	3.10694	6.50917	4.28748	6.54279	3.92132	5.77981	0.714321	1.29251
		Q	46	3.5041	3.53643	2.68772	4.88691	4.03224	4.28023	3.24275	4.39979	0.48094	0.4397
		E	47	4.91969	5.87829	2.9696	7.18716	4.40209	7.37388	4.58919	6.32105	1.48224	1.66448
		C	48	4.2242	5.41524	2.10053	3.82345	3.89091	5.48152	3.91332	4.39862	1.67908	0.938423
		P	49	3.78162	5.67729	2.87793	7.52212	4.40876	3.6061	4.11228	5.17899	1.42867	2.06852
		A	50	5.28279	6.46974	3.36782	6.2574	5.68189	6.44806	5.04012	6.12912	1.56513	0.398872
		Q	51	7.49702	9.09061	4.8962	5.5848	7.1531	8.74392	7.16128	7.16061	2.11727	1.57958
		L	52	8.13994	7.72603	5.82711	4.21883	6.92991	9.38295	7.23103	6.8439	1.23331	2.58313
		C	53	6.68665	5.92659	4.98949	3.70804	7.22915	7.95905	5.86758	6.29874	0.850115	2.27311
		T	54	5.89255	6.04303	4.25	5.55947	8.37229	7.84853	5.39519	7.2601	0.994618	1.49589
		A	55	7.15842	7.51352	3.83226	5.68119	8.21292	7.96591	6.16807	7.28667	2.03064	1.39586
		D	56	8.35752	9.13589	4.03093	7.11415	10.0941	8.99362	7.17478	8.73394	2.75033	1.50683
		S	57	9.21245	8.95315	5.75478	7.95232	11.7698	10.8648	7.97346	10.1956	1.9258	1.99478
		T	58	10.1248	9.0267	7.3682	8.40911	12.9002	11.4257	8.83991	10.9117	1.38777	2.28926
		G	59	10.3693	9.02878	7.60782	9.19805	12.7813	11.6689	9.00197	11.2161	1.38093	1.83404
