# Supplementary material for: C-mannosylation supports folding and enhances stability of thrombospondin repeats
Source: eLife journal article supplement (doi:10.7554/elife.52978), 2019-12-23

# A

signal TSR2 His<sub>6</sub> secreted from S2 cells + DPY-19 (28°C)

trypsin

LDGGWSSWSDWSACSSSCHR

mannose

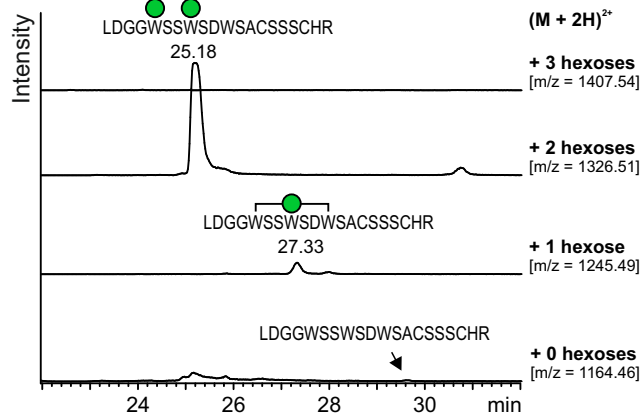

# B

MSMS spectrum of the peptide + 2 hexoses

(M + 2H)<sup>2+</sup> m/z = 1326.51

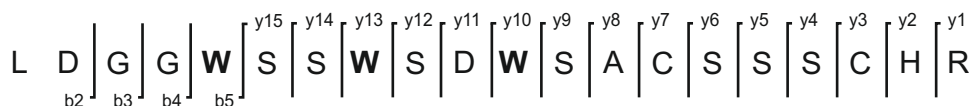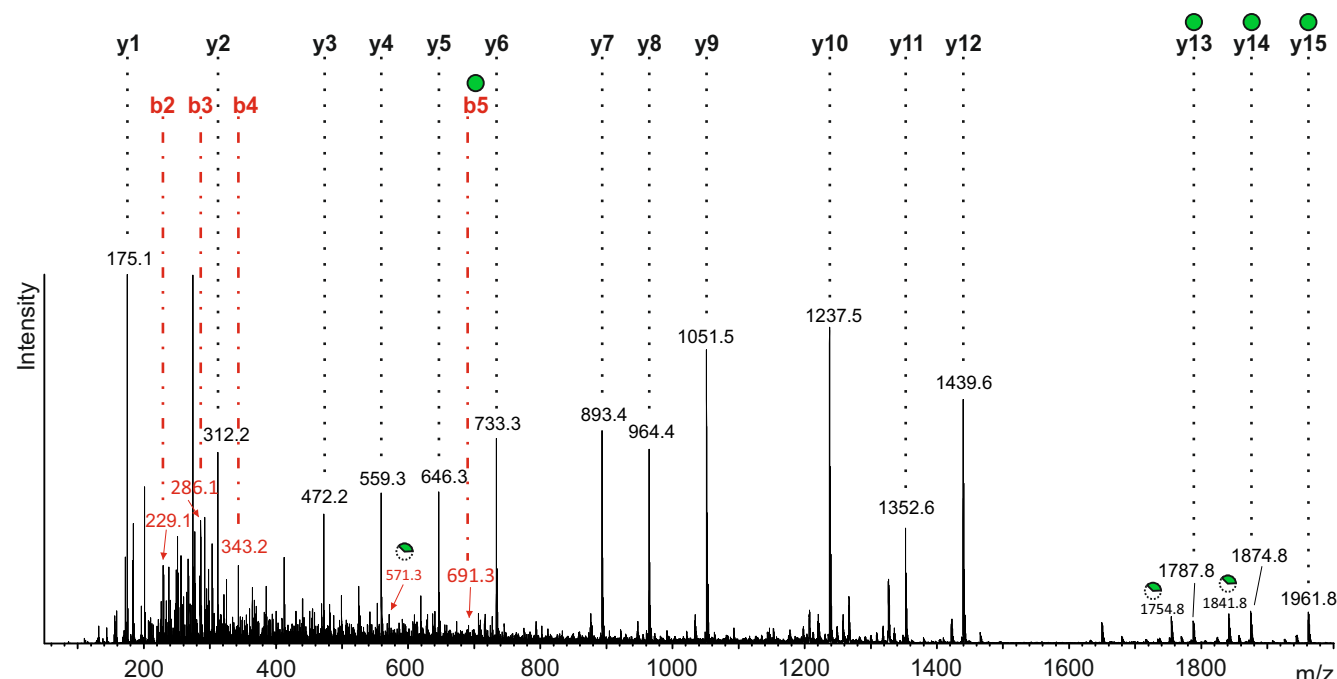

Supplement: supp [file elife-52978-supp-v1.zip]
