# Supplementary figures and images for: C-mannosylation supports folding and enhances stability of thrombospondin repeats
Source: eLife journal article supplement (doi:10.7554/elife.52978), 2019-12-23

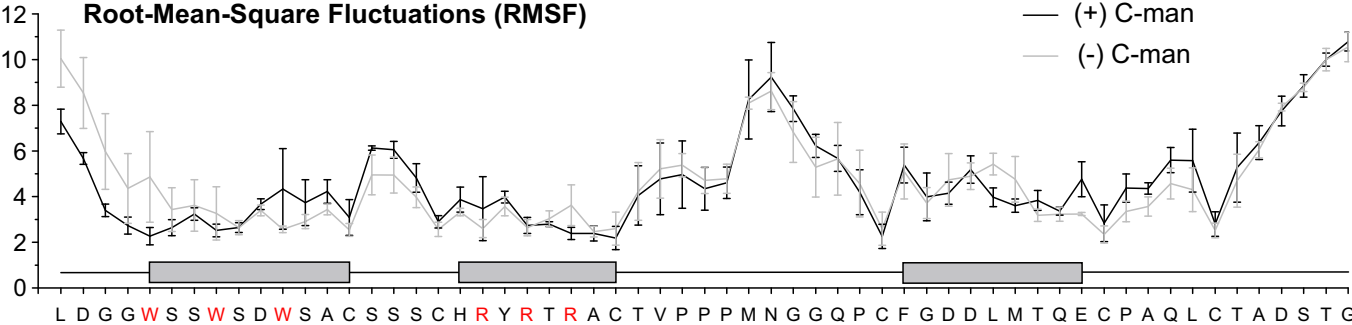

Supplement: supp [file elife-52978-supp-v1.zip]

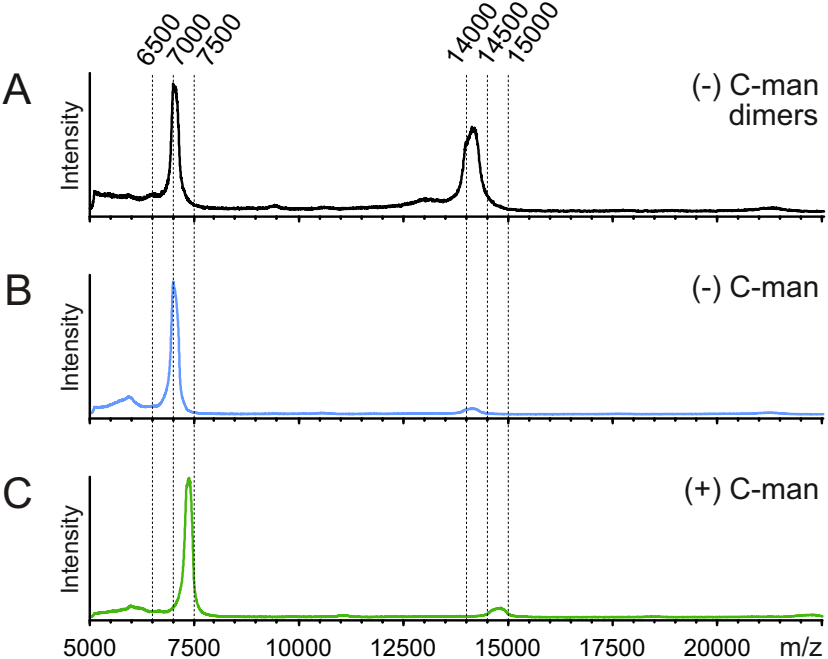

Supplement: supp [file elife-52978-supp-v1.zip]

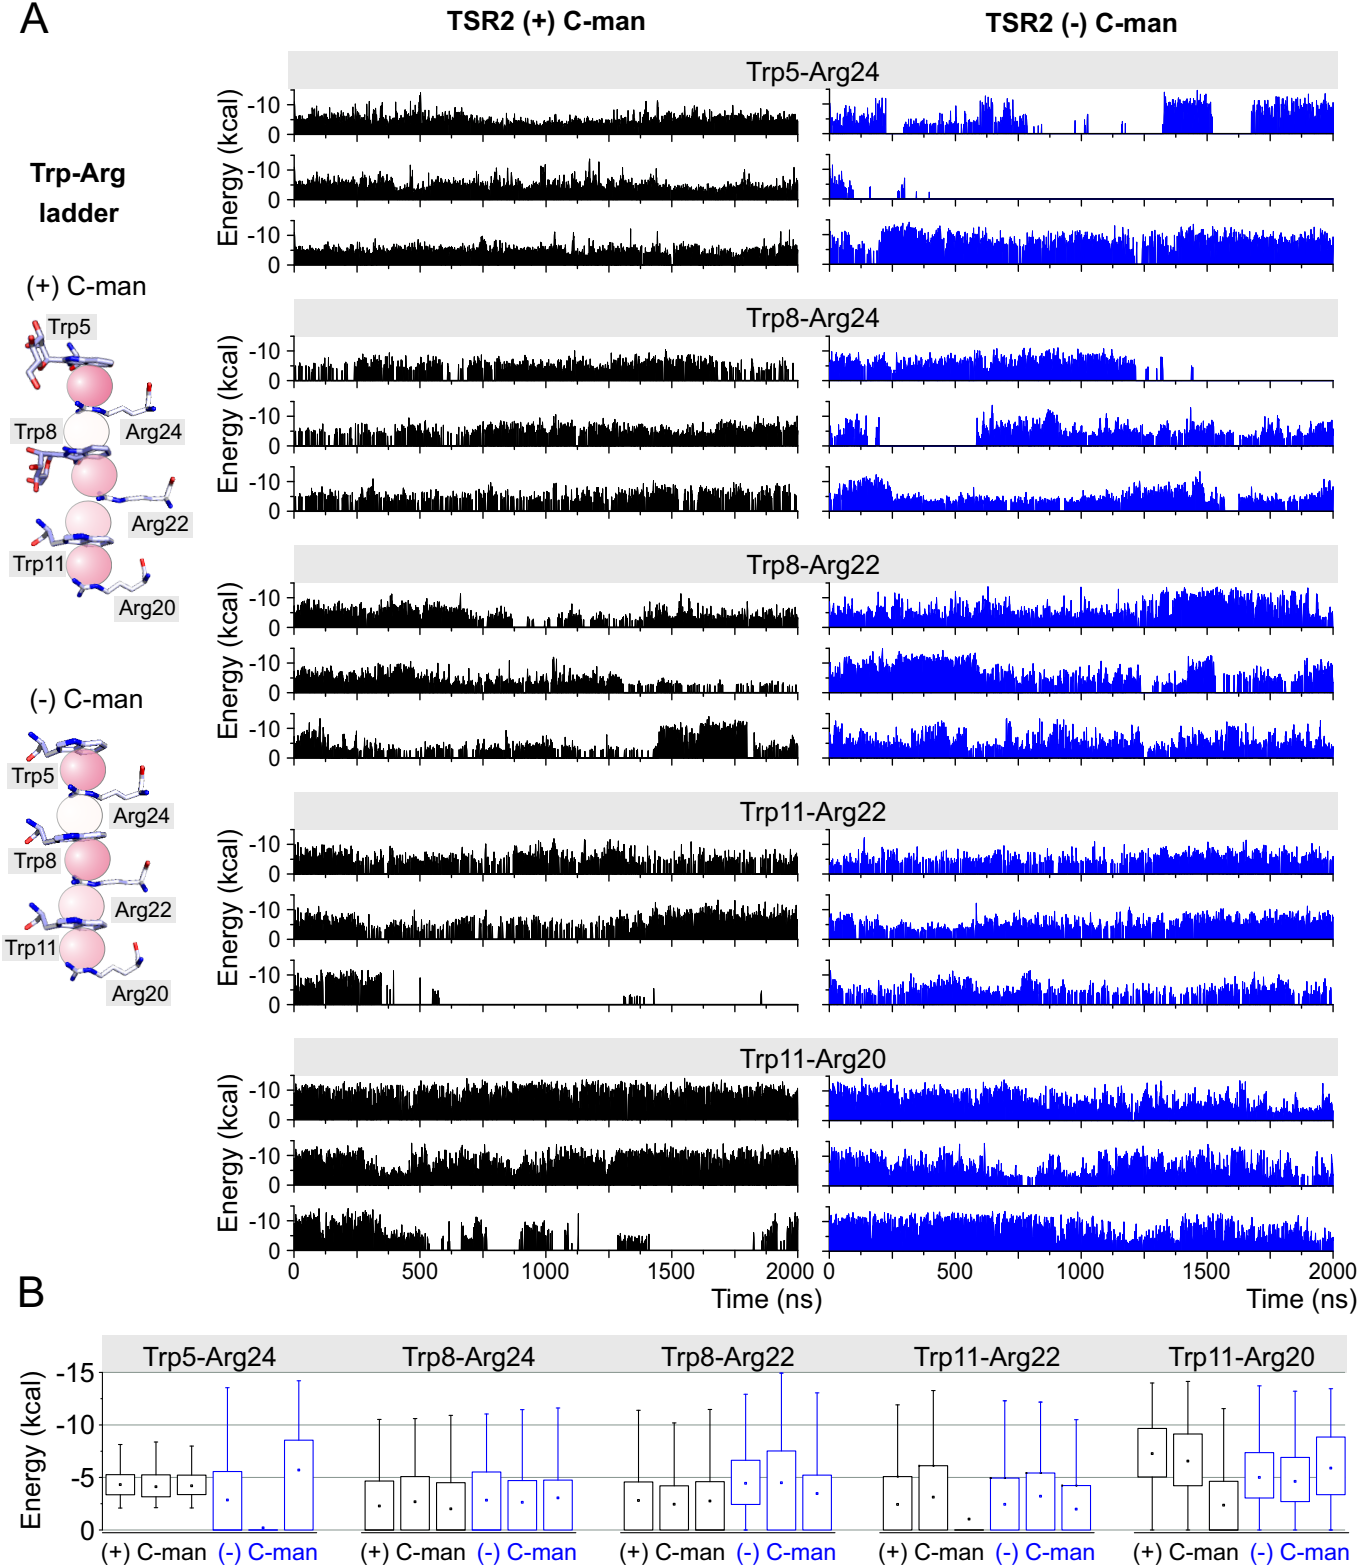

Supplement: supp [file elife-52978-supp-v1.zip]

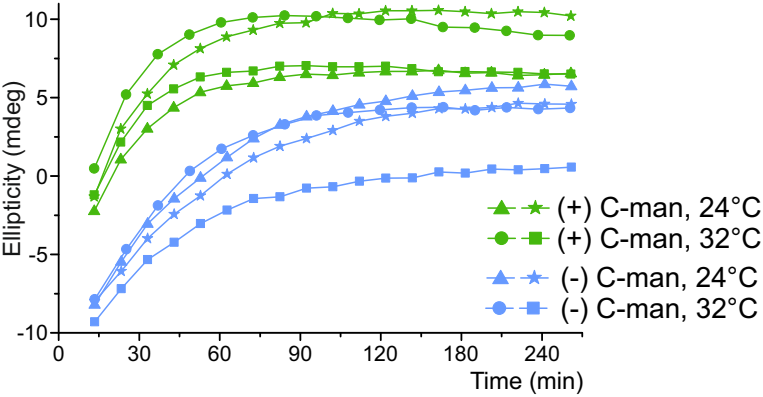

Supplement: supp [file elife-52978-supp-v1.zip]

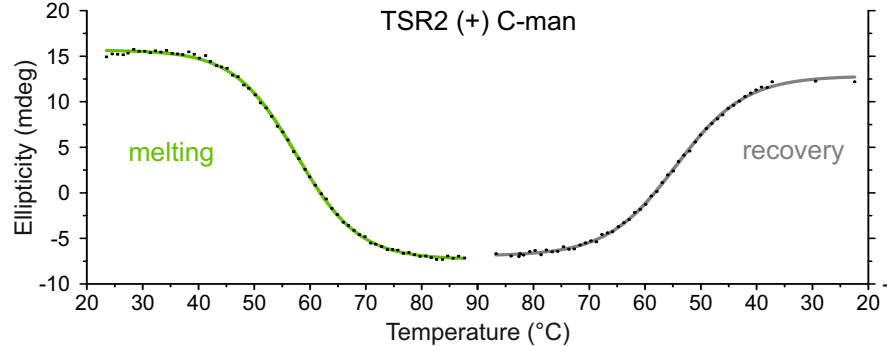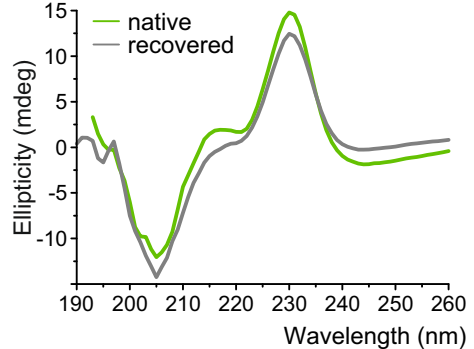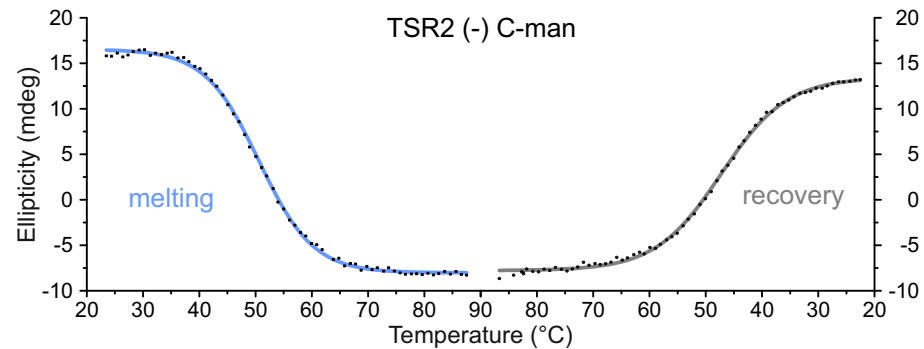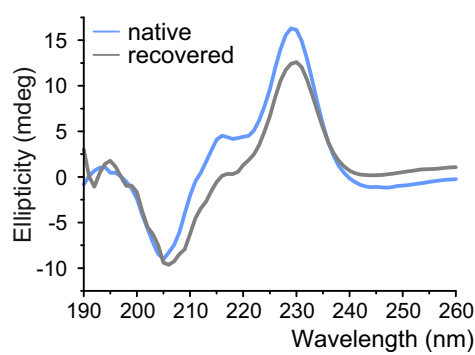

Supplement: supp [file elife-52978-supp-v1.zip]

**100 ns**

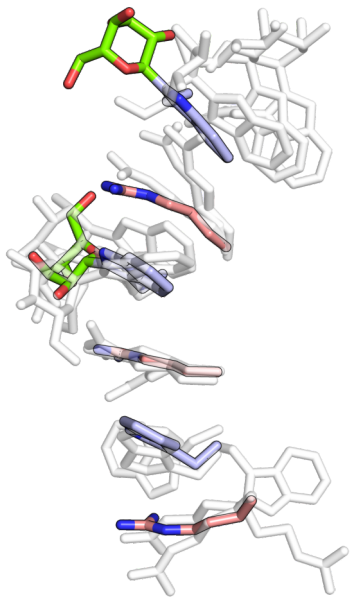

**200 ns**

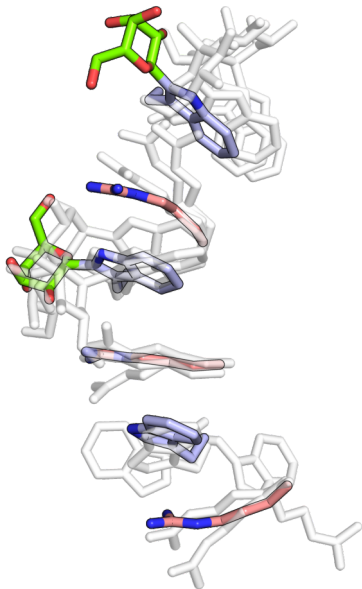

Supplement: supp [file elife-52978-supp-v1.zip]

18°C

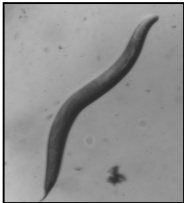

20°C

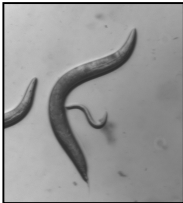

22°C

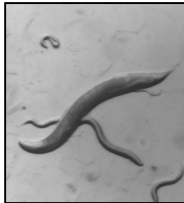

24°C

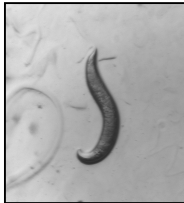

*C. elegans* *dpy-19* mutants

Supplement: supp [file elife-52978-supp-v1.zip]

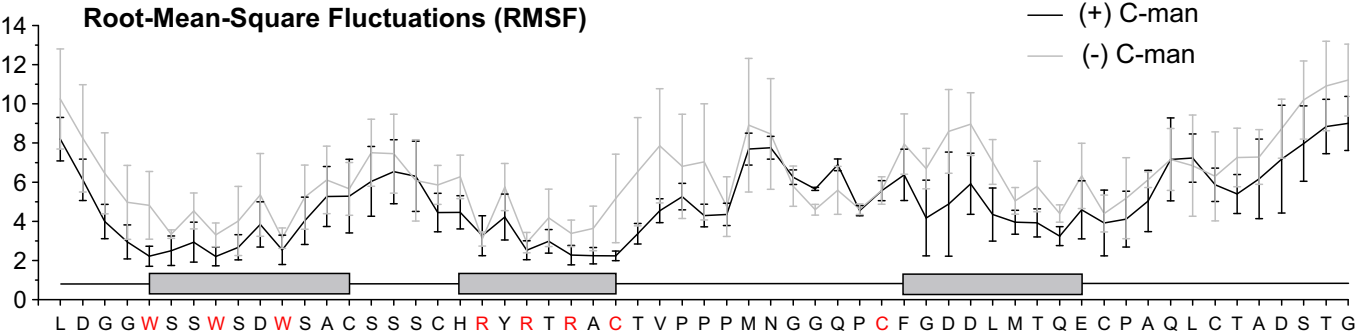

Supplement: supp [file elife-52978-supp-v1.zip]

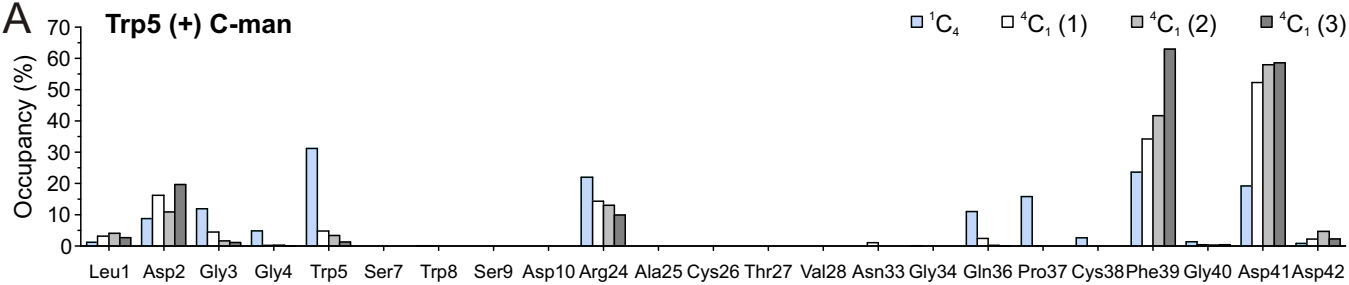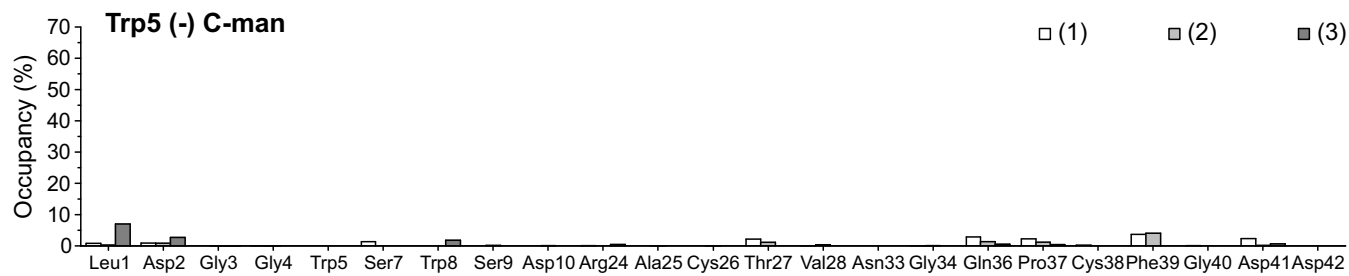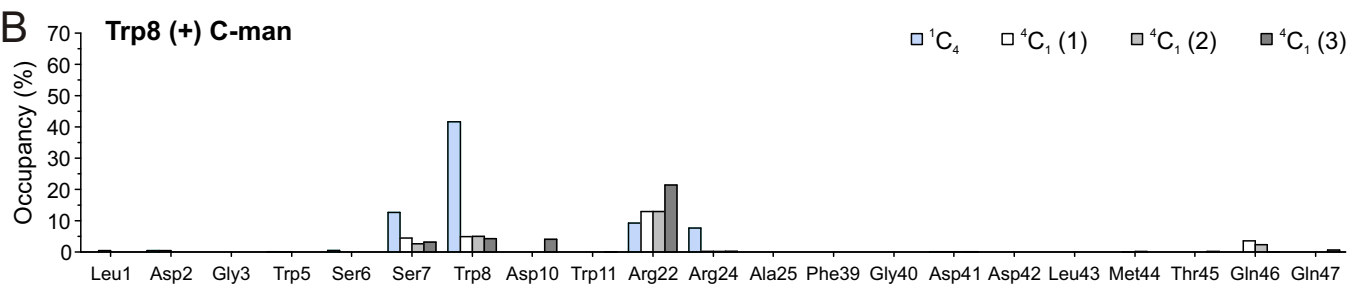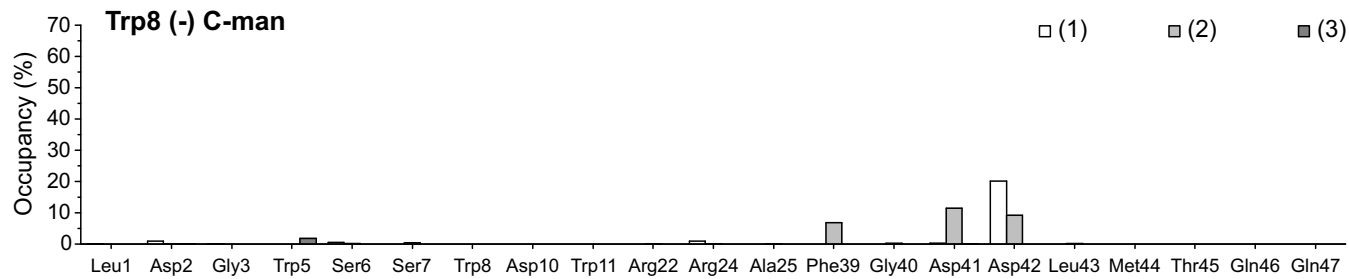

Supplement: supp [file elife-52978-supp-v1.zip]

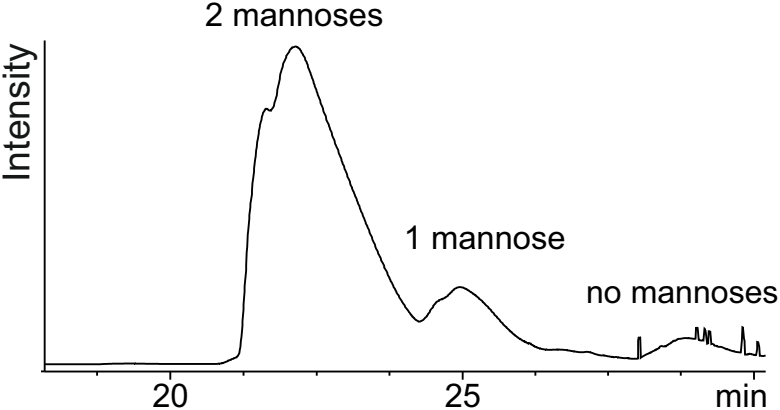

Supplement: supp [file elife-52978-supp-v1.zip]
